# Supplementary material for: Transcriptome and Coexpression Network Analyses Provide In-Sights into the Molecular Mechanisms of Hydrogen Cyanide Synthesis during Seed Development in Common Vetch (Vicia sativa L.)
Source: MDPI journal article supplement (doi:10.3390/ijms23042275), 2022-02-18
Supplement: s1 [file s1]

Supplementary materials

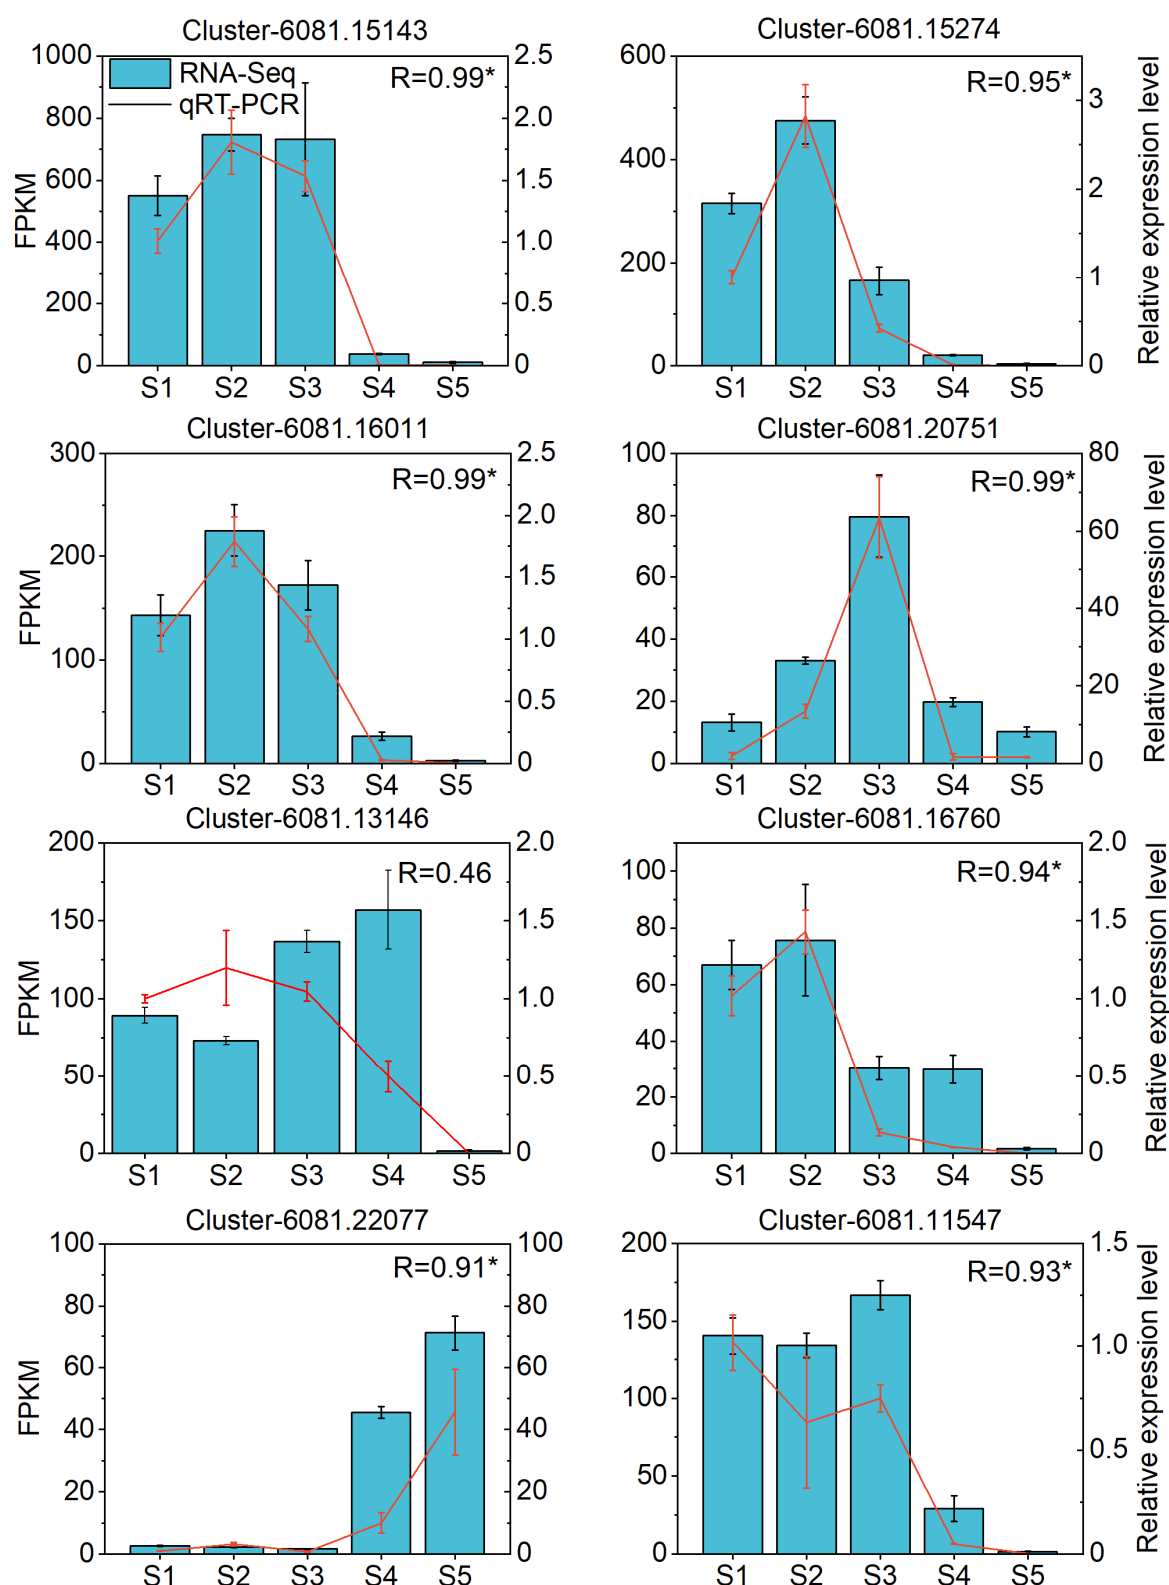

**Figure S1.** qRT-PCR validation of eight randomly selected genes. The Y-axis on the left side of each chart indicates the expression level (FPKM) of RNA-seq. The Y-axis on the right side of each chart indicates the relative expression of qRT-PCR.

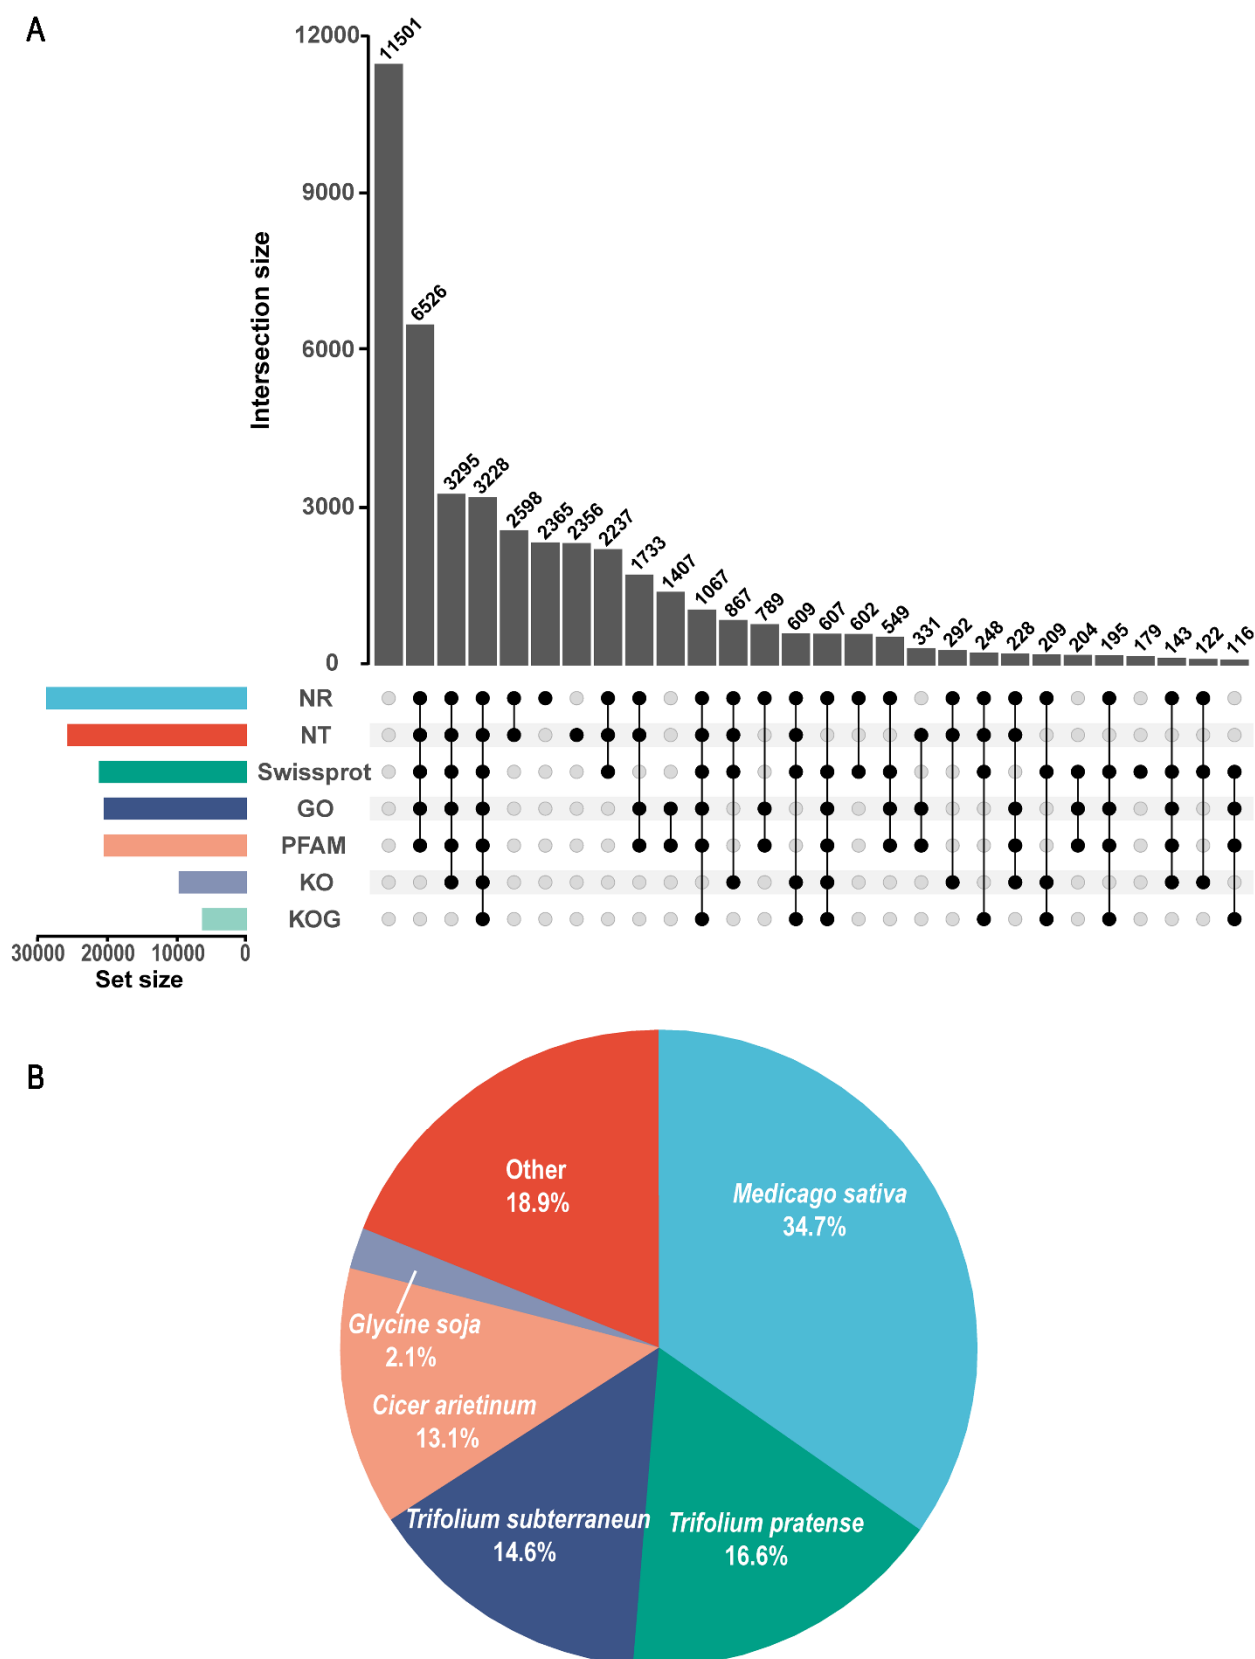

**Figure S2.** Statistics of transcripts annotation. (A) Number of transcripts annotated to the seven databases. (B) The top five species distribution of transcripts that were annotated on the basis of homology.

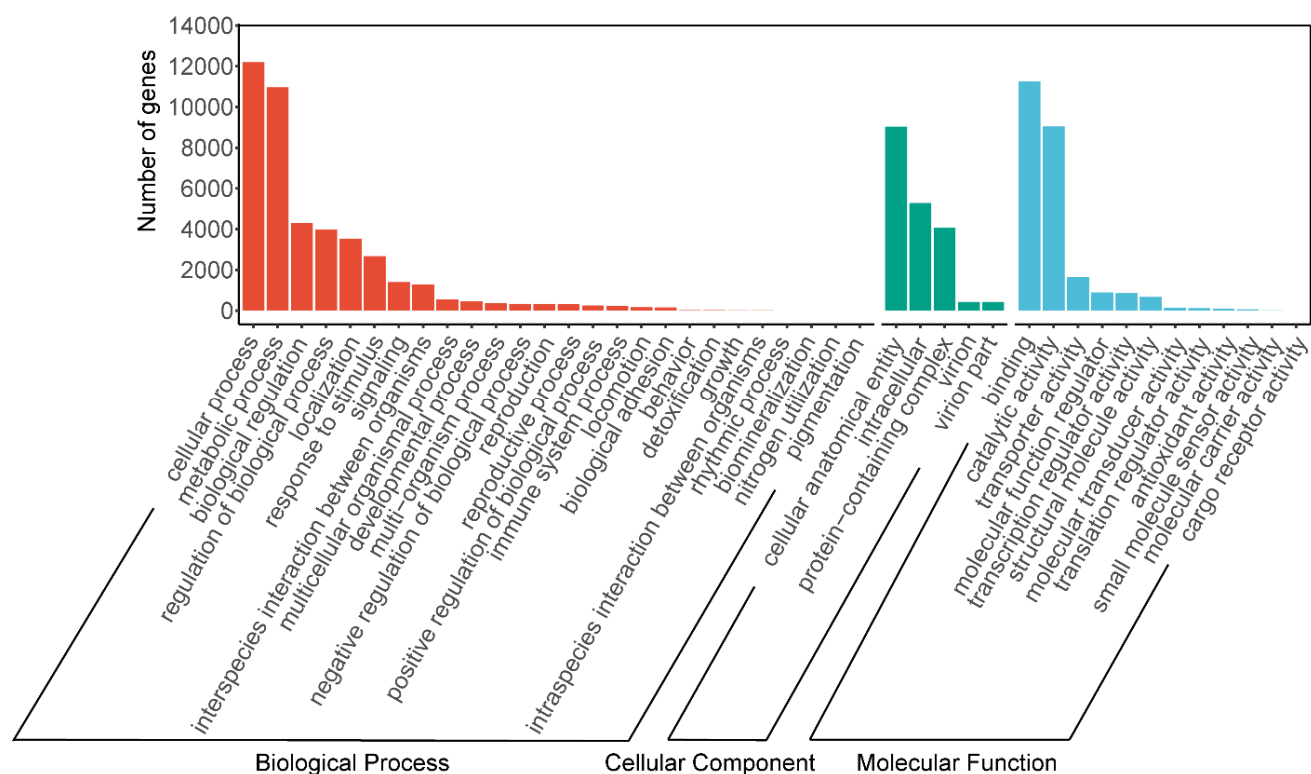

**Figure S3.** GO function annotation of the unigenes in common vetch seed.

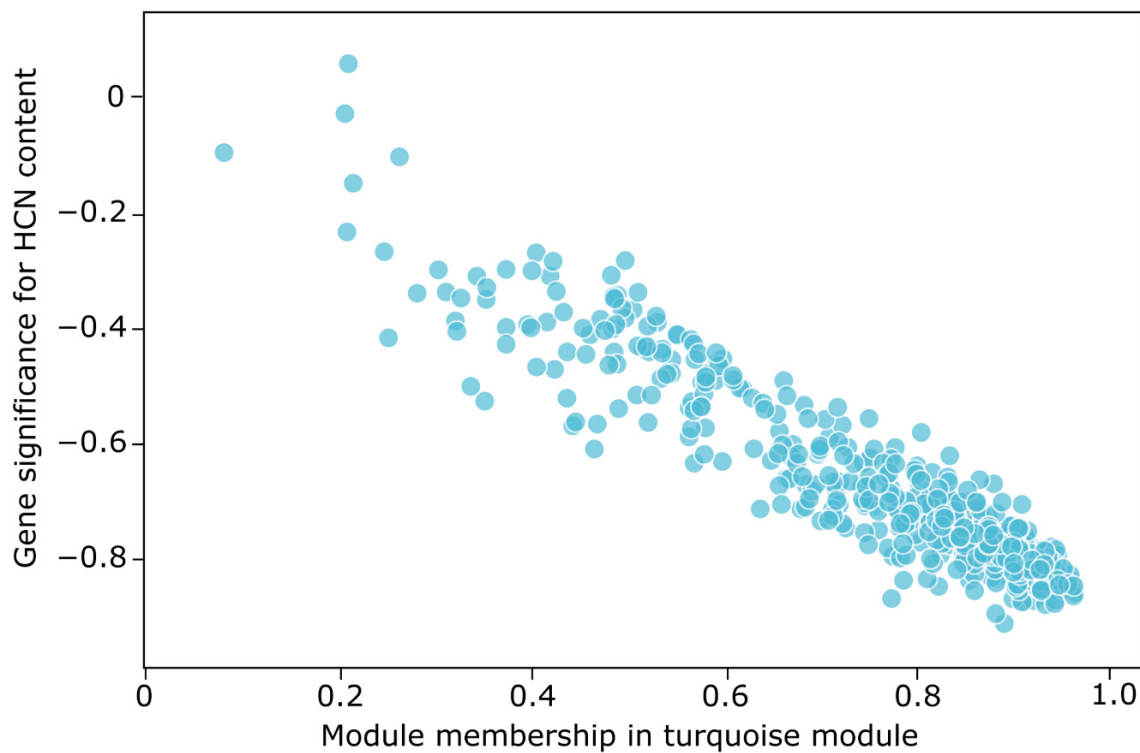

**Figure S4.** Correlation between module membership (MM) and gene significance (GS) for HCN content in turquoise module.
