# Supplementary material for: Transcriptome and Coexpression Network Analyses Provide In-Sights into the Molecular Mechanisms of Hydrogen Cyanide Synthesis during Seed Development in Common Vetch (Vicia sativa L.)
Source: Int J Mol Sci. 2022 Feb 18;23(4):2275. doi: 10.3390/ijms23042275 (PMC8878228; doi:10.3390/ijms23042275)
Supplement: Supplementary file 1 [file ijms-23-02275-s001.zip › Supplementary tables.xlsx]

## Sheet: Table S1
Table S1. Summary statistics of RNA-Seq results in seed development of common vetch
Item	Raw reads	Clean reads	Clean data size(G）	Q30(%)	GC(%)
S1-1	21634708	21198644	6.36	94.51	42.51
S1-2	21635685	21137158	6.34	94.72	42.18
S1-3	23319961	22691928	6.81	94.24	42.94
S2-1	20639960	20107285	6.03	94.66	42.79
S2-2	23971081	23712653	7.11	93.96	43.05
S2-3	20019425	19641824	5.89	93.89	42.83
S3-1	22158190	21907536	6.57	94.2	42.49
S3-2	21638803	21085743	6.33	94.73	42.18
S3-3	21736613	21151931	6.35	94.75	42.62
S4-1	21229391	20709988	6.21	94.53	42.14
S4-2	22246201	21831201	6.55	94.89	42.03
S4-3	21654624	21185990	6.36	94.59	42.16
S5-1	22109962	21653934	6.5	94.34	42.88
S5-2	21837149	21228231	6.37	94.91	42.79
S5-3	23696944	23027168	6.91	94.78	42.37
S6-1	21910069	21310567	6.39	94.57	42.68
S6-2	23499776	23288419	6.99	94.23	42.53
S6-3	22890244	22634971	6.79	94.12	42.52
S7-1	23588186	23279448	6.98	93.93	42.81
S7-2	23290477	22852833	6.86	94.6	43.27
S7-3	23548266	23107062	6.93	95.75	43.4

## Sheet: Table S2
Table S2. Statistics of transcriptome assembly showing length distribution of transcript and unigene
Number of the transcripts and unigenes	Transcripts	Unigenes
300-500	20538	11659
501-1000	26662	11381
1001-2000	38347	9293
>2000	58730	12601

## Sheet: Table S3
Table S3. The primer information used in qRT–PCR
Gene ID	Forward primer (5' to 3')	Reverse primer (3' to 5')
VsGT1-1	AGCCAGTGTGTTGGTTCACA	CGTGTGTCCATCTGCCTCAT
VsGT1-4	AGCTGGTGCGAACAAACCTA	CTCCCCAACCCTACCAACAC
VsGT1-7	TGAGAGCGATCAACGAGTGG	ACAGCATGTTTCGTCGGACT
VsGT1-13	ACCCGTGAGCACTATGGTTG	TTACATTCGGCGCAAAAGGC
VsGT1-14	TCGGAGAAGGTAGACTCGCA	TAGCAGCGATGTGATTCCCC
VsGT2	AATCTGTCGACCGTCTGGTG	GGTCCCCACTAATCCTTGGC
VsGH17	GCTCATGTTTCTTCTGGCGG	ACTCGAGTACTCAAACCGGC
VsCYP71A	AATGGTGCACAATGCCGTTC	CGAAGGGTTTCTCCCAACCA
Cluster-6081.15143	AAACTAGCCGCAGGTTGACA	AGCTTGGCGTTCTTTCCGTA
Cluster-6081.15274	TTGCACCCTCGAGACATTCC	CTTCCTCCAAGGCACGAACT
Cluster-6081.16011	CTCGTTATCTCAGCGGCGAA	TTTGGACCAGTGCAACCCAT
Cluster-6081.20751	GCATGCAGCGAAAACGAGAA	AGGAGTTGGTGCCAAACTGT
Cluster-6081.13146	TTACCAAACGAGCTGCAACG	AATAGGTGCGAGCGATGTGA
Cluster-6081.16760	TATGCCACTGTCGATCCTGC	CGGGGCTCAATGCTACTCAT
Cluster-6081.22077	TCTTACTTCTGTCGCGCCTC	GAAAAGGGGCCCAACAATGG
Cluster-6081.11547	GTCCCGTGCATATGCGAGTA	CTGCAGTTCCCTGGAACCAA
unigene68614	GCTAAAGCATTGAACAACAAAAGA	GCAAAGTTTGTCCCTTCACC

## Sheet: Table S4
Table S4. Success rate statistics of transcripts annotation
Database	Number of Unigenes	Percentage(%)
Annotated in NR	28696	63.86
Annotated in NT	25674	57.13
Annotated in KO	9776	21.75
Annotated in SwissProt	21173	47.12
Annotated in PFAM	20478	45.57
Annotated in GO	20476	45.56
Annotated in KOG	6432	14.31
Annotated in all Databases	3229	7.18
Annotated in at least one Database	33433	74.4

## Sheet: Table S5
Tasble S5. List of the KEGG pathwayswith enriched with the differentially expressed genes (DEGs) during seed development.
Pathway	Pathway ID	Gene number	Background number	Pvalue	Qvalue	Genes	KOs
Phenylpropanoid biosynthesis	ko00940	88	152	3.49564e-05	0.00419477	Cluster-6081.21037;Cluster-10905.0;Cluster-6081.5270;Cluster-6081.16343;Cluster-6081.1106;Cluster-6081.9534;Cluster-6081.3670;Cluster-6081.14680;Cluster-6081.15846;Cluster-6081.10379;Cluster-6081.8248;Cluster-6081.8247;Cluster-6081.24327;Cluster-6081.6088;Cluster-6081.9026;Cluster-6081.30696;Cluster-6081.11393;Cluster-6081.11390;Cluster-6081.23945;Cluster-6081.11396;Cluster-6081.11394;Cluster-608…	K01188|K13066|K00083|K13065|K01188|K00430|K00430|K00430|K10775|K05350|K13065|K13065|K00430|K00430|K01904|K01904|K01188|K01188|K00430|K01188|K01188|K00083|K00083|K00430|K11188|K00430|K13065|K05349|K00430|K00083|K01188|K10775|K10775|K05350|K00430|K00588|K13066|K00430|K00083|K01188|K13065|K01188|K01188|K00487|K13066|K12356|K00083|K01904|K09755|K00430|K05350|K01904|K00430|K01188|K01188|K01188|K00430|…
Plant hormone signal transduction	ko04075	118	236	0.000229865	0.0102515	Cluster-6081.6821;Cluster-6081.20687;Cluster-6081.895;Cluster-4028.0;Cluster-5558.0;Cluster-6081.9229;Cluster-6081.22029;Cluster-6081.21731;Cluster-6081.16915;Cluster-6081.4569;Cluster-6081.15474;Cluster-6081.19403;Cluster-6081.9421;Cluster-6081.4396;Cluster-6081.7516;Cluster-6081.27579;Cluster-6081.6062;Cluster-6081.25711;Cluster-10431.0;Cluster-6081.13667;Cluster-6081.16476;Cluster-6081.8635;Cl…	K14496|K13416|K14431|K14488|K14491|K14500|K14496|K14484|K16189|K14431|K14484|K14492|K14488|K14496|K14484|K14508|K13463|K14509|K14491|K14497|K14486|K14431|K14484|K13416|K13416|K14489|K14487|K14489|K14432|K12126|K14484|K14496|K14514|K14432|K14497|K14514|K14488|K14432|K14497|K14487|K14490|K14497|K14431|K14488|K14492|K13946|K14488|K14488|K14484|K14431|K14484|K14498|K14493|K14488|K14484|K14431|K14432|…
Starch and sucrose metabolism	ko00500	112	223	0.000288782	0.0102515	Cluster-6081.21037;Cluster-6081.13789;Cluster-6081.11361;Cluster-6081.4013;Cluster-6081.11835;Cluster-6081.1106;Cluster-6081.23821;Cluster-6081.20239;Cluster-6081.12959;Cluster-6081.1663;Cluster-6081.2276;Cluster-6081.30102;Cluster-6081.6949;Cluster-6081.18564;Cluster-11666.0;Cluster-6081.7595;Cluster-6081.10379;Cluster-6081.3364;Cluster-6081.12440;Cluster-6081.6408;Cluster-6081.20751;Cluster-608…	K01188|K19891|K16055|K01051|K19893|K01188|K01051|K01213|K00705|K01051|K01184|K01051|K01051|K00695|K00975|K00688|K05350|K01087|K00844|K01194|K00963|K01193|K01188|K01188|K01188|K16055|K01188|K01051|K00696|K01087|K01179|K05349|K00975|K00695|K00695|K01188|K16055|K05350|K01179|K01051|K01051|K01051|K01193|K01188|K01188|K01188|K19892|K19891|K01051|K00700|K16055|K01179|K00975|K05350|K01188|K01188|K01188|…
Flavonoid biosynthesis	ko00941	32	41	0.000341718	0.0102515	Cluster-6081.17575;Cluster-6081.17576;Cluster-6081.14584;Cluster-6081.11652;Cluster-6081.20271;Cluster-6081.1965;Cluster-6081.16343;Cluster-6081.1366;Cluster-6081.15225;Cluster-6081.5834;Cluster-6081.15331;Cluster-6081.15334;Cluster-6081.2031;Cluster-6081.6844;Cluster-6081.1923;Cluster-6081.16258;Cluster-6081.14685;Cluster-6081.8248;Cluster-6081.5473;Cluster-4559.0;Cluster-6081.15400;Cluster-6081…	K05280|K05280|K13083|K00660|K05280|K00660|K13065|K01859|K00475|K00660|K13081|K00660|K05278|K00588|K05278|K05280|K00660|K13065|K13065|K00660|K00660|K13065|K01859|K00487|K05277|K13082|K13082|K08695|K13065|K05280|K05280|K01859|
Photosynthesis	ko00195	29	45	0.00495779	0.118987	Cluster-6081.13523;Cluster-6081.16715;Cluster-6081.23600;Cluster-6081.24843;Cluster-6081.18182;Cluster-6081.14607;Cluster-6081.17987;Cluster-6081.15345;Cluster-6081.14065;Cluster-6081.6370;Cluster-6081.9651;Cluster-6081.15495;Cluster-6081.17327;Cluster-6081.13242;Cluster-6081.14866;Cluster-6081.14961;Cluster-6081.14955;Cluster-6081.15291;Cluster-6081.15290;Cluster-6081.11259;Cluster-6081.22982;Cl…	K02693|K02641|K02703|K08901|K02717|K08905|K02115|K02723|K02639|K08906|K08902|K08901|K02636|K02692|K02716|K02694|K02717|K02638|K02723|K02721|K02721|K14332|K02699|K02109|K03542|K02639|K08901|K02693|K02703|
Cyanoamino acid metabolism	ko00460	38	67	0.00703565	0.119276	Cluster-6081.5467;Cluster-6081.21037;Cluster-3271.0;Cluster-6081.20365;Cluster-6081.979;Cluster-6081.24002;Cluster-6081.1106;Cluster-6081.22752;Cluster-6081.8894;Cluster-6081.3656;Cluster-6081.8307;Cluster-6081.15215;Cluster-6081.6532;Cluster-2967.0;Cluster-6081.6142;Cluster-6081.8964;Cluster-6081.7596;Cluster-6081.10379;Cluster-6081.2908;Cluster-6081.4172;Cluster-6081.4363;Cluster-6081.8743;Clus…	K05350|K01188|K13034|K01188|K05349|K05349|K01188|K00600|K13035|K05350|K00600|K05349|K01188|K01188|K01188|K00600|K13035|K05350|K18592|K05349|K01188|K01188|K01188|K01188|K01188|K18592|K18592|K18592|K01188|K01188|K01188|K13034|K01188|K01188|K01188|K01188|K08248|K18592|
Pentose and glucuronate interconversions	ko00040	47	89	0.00799021	0.119276	Cluster-6081.24168;Cluster-6081.15924;Cluster-6081.27326;Cluster-6081.17411;Cluster-6081.14453;Cluster-6081.4013;Cluster-6081.16871;Cluster-6081.26927;Cluster-6081.16011;Cluster-6081.23821;Cluster-6081.27392;Cluster-6081.16486;Cluster-6081.20239;Cluster-6081.6755;Cluster-6081.16924;Cluster-6081.1726;Cluster-6081.5871;Cluster-6081.1663;Cluster-6081.2276;Cluster-6081.12769;Cluster-6081.30102;Cluste…	K01051|K00128|K01051|K01728|K01051|K01051|K00128|K01051|K00963|K01051|K12447|K01728|K01213|K16190|K01728|K01051|K01728|K01051|K01184|K00012|K01051|K01051|K00128|K00128|K01051|K00128|K01051|K01051|K01728|K01051|K01051|K01728|K01051|K00963|K01051|K01805|K12447|K01728|K01728|K12447|K01051|K01728|K01051|K01213|K12447|K12447|K01051|
Cutin, suberine and wax biosynthesis	ko00073	17	22	0.00867898	0.119276	Cluster-6081.12902;Cluster-6081.1316;Cluster-6081.1793;Cluster-6081.5749;Cluster-6081.14056;Cluster-6081.14418;Cluster-6081.29011;Cluster-6081.11911;Cluster-6081.12510;Cluster-6081.28109;Cluster-1959.1;Cluster-6081.19796;Cluster-6081.28160;Cluster-6081.17037;Cluster-6081.11557;Cluster-6081.27933;Cluster-6081.1904	K17991|K13356|K13356|K17991|K15403|K13407|K15400|K13356|K15403|K15402|K15400|K15404|K17991|K15398|K15398|K15404|K17991|
alpha-Linolenic acid metabolism	ko00592	30	50	0.00894569	0.119276	Cluster-6081.27489;Cluster-6081.1868;Cluster-6081.27151;Cluster-6081.10871;Cluster-6081.4871;Cluster-6081.19460;Cluster-6081.20213;Cluster-6081.19043;Cluster-6081.7259;Cluster-6081.7258;Cluster-6081.11164;Cluster-6081.27739;Cluster-6081.27740;Cluster-6081.9771;Cluster-6081.17541;Cluster-6081.17542;Cluster-6081.21981;Cluster-6081.21769;Cluster-6081.5348;Cluster-6081.10918;Cluster-6081.17845;Cluste…	K10529|K00454|K10529|K10525|K01723|K05894|K10527|K18857|K00454|K00454|K18857|K10529|K10529|K05894|K18857|K18857|K10527|K01723|K05894|K00232|K10525|K00454|K05894|K01723|K00454|K10529|K01723|K00454|K00454|K00232|
Linoleic acid metabolism	ko00591	18	25	0.0114534	0.137441	Cluster-6081.1160;Cluster-6081.18068;Cluster-6081.15313;Cluster-6081.7259;Cluster-6081.7258;Cluster-6081.18871;Cluster-6081.13999;Cluster-6081.1868;Cluster-6081.5030;Cluster-6081.2092;Cluster-8929.0;Cluster-6081.3121;Cluster-6081.25972;Cluster-6081.16403;Cluster-6081.7802;Cluster-6081.1815;Cluster-9106.0;Cluster-6081.16529	K00454|K15718|K15718|K00454|K00454|K15718|K15718|K00454|K15718|K15718|K15718|K15718|K07418|K15718|K15718|K00454|K00454|K00454|
ABC transporters	ko02010	36	68	0.0181007	0.197463	Cluster-6081.22265;Cluster-6081.13540;Cluster-6081.15908;Cluster-6081.30774;Cluster-6081.14727;Cluster-4874.0;Cluster-6081.20367;Cluster-6081.21246;Cluster-6081.16135;Cluster-6081.21244;Cluster-6081.21242;Cluster-6081.20368;Cluster-6081.16134;Cluster-6081.569;Cluster-6081.9045;Cluster-12206.0;Cluster-2863.0;Cluster-6081.26845;Cluster-11504.0;Cluster-6081.1922;Cluster-1712.0;Cluster-6081.11588;Clu…	K05666|K05658|K05674|K05658|K05666|K05658|K05666|K05666|K05658|K05666|K05666|K05666|K05658|K05658|K05666|K05658|K05658|K05658|K05658|K05658|K05658|K05658|K05658|K05658|K05643|K05666|K05666|K05658|K05658|K05666|K05658|K05658|K05658|K05666|K05666|K05658|
Brassinosteroid biosynthesis	ko00905	8	8	0.0273279	0.256291	Cluster-6081.24477;Cluster-6081.6916;Cluster-6081.26507;Cluster-6081.9775;Cluster-6081.3533;Cluster-6081.5026;Cluster-6081.3362;Cluster-6081.1331	K12637|K09587|K15639|K09590|K09590|K09587|K12637|K12638|
Diterpenoid biosynthesis	ko00904	14	20	0.0283277	0.256291	Cluster-6081.1208;Cluster-6081.2824;Cluster-6081.9416;Cluster-6081.11342;Cluster-6081.24828;Cluster-6081.28440;Cluster-6081.22966;Cluster-6081.26292;Cluster-6081.26410;Cluster-6081.25755;Cluster-6081.4895;Cluster-6081.1152;Cluster-6081.6080;Cluster-11544.0	K04123|K05282|K04123|K04122|K04125|K04125|K04124|K04120|K05282|K05282|K04125|K04125|K04123|K04125|
Photosynthesis - antenna proteins	ko00196	11	14	0.0299007	0.256291	Cluster-6081.16277;Cluster-6081.14550;Cluster-6081.12694;Cluster-6081.13865;Cluster-6081.13226;Cluster-6081.16431;Cluster-6081.14564;Cluster-6081.7721;Cluster-6081.12530;Cluster-3114.0;Cluster-6081.9376	K08914|K08912|K08915|K08908|K08907|K08916|K08913|K08911|K08917|K08912|K08910|
Glutathione metabolism	ko00480	45	95	0.034389	0.271935	Cluster-6081.30209;Cluster-6081.28980;Cluster-6081.16301;Cluster-6081.24064;Cluster-6081.21874;Cluster-6081.14490;Cluster-6081.18222;Cluster-6081.16790;Cluster-6081.22116;Cluster-6081.8197;Cluster-6081.19433;Cluster-6081.14289;Cluster-6081.1191;Cluster-10767.0;Cluster-6081.1593;Cluster-6081.14148;Cluster-6081.24422;Cluster-6081.19590;Cluster-6081.19591;Cluster-6081.19592;Cluster-6081.24139;Cluste…	K00799|K00799|K00031|K00799|K00799|K00036|K00799|K00799|K00434|K00799|K00799|K10807|K00799|K00799|K10808|K00799|K00799|K00799|K00799|K00799|K00383|K00799|K00799|K18592|K00432|K00799|K00797|K01919|K00434|K01469|K18592|K18592|K18592|K00432|K00799|K00799|K10808|K00799|K00036|K00799|K00799|K01919|K00799|K00799|K18592|
Ubiquinone and other terpenoid-quinone biosynthesis	ko00130	21	37	0.0384019	0.271935	Cluster-6081.20297;Cluster-6081.6905;Cluster-6081.26374;Cluster-6081.5007;Cluster-6081.29106;Cluster-6081.1089;Cluster-6081.30696;Cluster-6081.21432;Cluster-6081.8874;Cluster-6081.16306;Cluster-6081.17775;Cluster-6081.11183;Cluster-6081.17533;Cluster-6081.9026;Cluster-6081.15031;Cluster-6081.3395;Cluster-11918.0;Cluster-6081.11002;Cluster-6081.8294;Cluster-6081.15358;Cluster-6081.10675	K12501|K14760|K01904|K03809|K09833|K01904|K01904|K03809|K01904|K01904|K02548|K00457|K00815|K01904|K00487|K05928|K03809|K14759|K01661|K03809|K03809|
Flavone and flavonol biosynthesis	ko00944	7	7	0.0385367	0.271935	Cluster-6081.17575;Cluster-6081.17576;Cluster-6081.14584;Cluster-6081.20271;Cluster-6081.16258;Cluster-6081.18410;Cluster-6081.18411	K05280|K05280|K13083|K05280|K05280|K05280|K05280|
Tryptophan metabolism	ko00380	20	35	0.0407902	0.271935	Cluster-6081.24460;Cluster-6081.15924;Cluster-6081.2658;Cluster-6081.4163;Cluster-6081.13765;Cluster-3275.0;Cluster-6081.6063;Cluster-6081.14845;Cluster-6081.26328;Cluster-6081.4643;Cluster-6081.16871;Cluster-6081.24950;Cluster-6081.2744;Cluster-6081.5029;Cluster-6081.2893;Cluster-6081.10561;Cluster-6081.639;Cluster-6081.7201;Cluster-6081.24930;Cluster-6081.11445	K16903|K00128|K16903|K11816|K00128|K11816|K16903|K00128|K11816|K00128|K00128|K00626|K11816|K11816|K11816|K11816|K16903|K01426|K11816|K03781|
Galactose metabolism	ko00052	33	67	0.0448492	0.283258	Cluster-6081.20499;Cluster-6081.14665;Cluster-6081.27392;Cluster-6081.11876;Cluster-6081.27176;Cluster-6081.27175;Cluster-6081.27174;Cluster-6081.16011;Cluster-6081.12831;Cluster-6081.23978;Cluster-6081.7356;Cluster-6081.9296;Cluster-6081.485;Cluster-6081.16083;Cluster-6081.12440;Cluster-6081.27960;Cluster-6081.22467;Cluster-6081.14997;Cluster-6081.15352;Cluster-6081.18233;Cluster-6081.20751;Clus…	K01193|K00844|K12447|K06617|K07407|K07407|K07407|K00963|K01190|K01785|K06617|K06617|K01193|K01784|K00844|K06611|K01193|K07407|K01835|K06617|K00963|K00850|K01193|K18819|K00850|K12447|K12447|K18819|K07407|K06617|K06617|K12447|K12447|
Taurine and hypotaurine metabolism	ko00430	12	18	0.0510623	0.299253	Cluster-6081.2908;Cluster-6081.21673;Cluster-6081.3500;Cluster-6081.12770;Cluster-6081.27860;Cluster-6081.22334;Cluster-6081.4230;Cluster-6081.18813;Cluster-6081.9345;Cluster-6081.9344;Cluster-6081.23249;Cluster-6081.2169	K18592|K10712|K10712|K01580|K10712|K10712|K10712|K01580|K18592|K18592|K18592|K18592|
Carotenoid biosynthesis	ko00906	21	39	0.0545816	0.299253	Cluster-6081.9288;Cluster-6081.6828;Cluster-6081.12612;Cluster-11800.0;Cluster-6081.12562;Cluster-5314.0;Cluster-6081.4935;Cluster-6081.7453;Cluster-6081.22378;Cluster-6081.6151;Cluster-6081.4570;Cluster-4788.0;Cluster-6081.5768;Cluster-6081.6424;Cluster-6081.16468;Cluster-6081.20361;Cluster-6081.17696;Cluster-6081.6009;Cluster-1698.0;Cluster-6081.8575;Cluster-6081.28689	K09839|K09842|K06443|K14593|K06444|K09843|K09843|K02291|K09842|K09840|K09840|K14593|K09842|K09842|K15746|K09842|K09841|K15746|K06444|K15744|K09843|
Glycerolipid metabolism	ko00561	37	79	0.0569333	0.299253	Cluster-6081.15924;Cluster-6081.8417;Cluster-6081.12479;Cluster-6081.21050;Cluster-6081.21051;Cluster-6081.7482;Cluster-6081.14335;Cluster-6081.16871;Cluster-6081.26883;Cluster-6081.27176;Cluster-6081.27175;Cluster-6081.27174;Cluster-6081.9659;Cluster-6081.20909;Cluster-6081.20908;Cluster-6081.4807;Cluster-9776.0;Cluster-6081.13701;Cluster-6081.11105;Cluster-6081.4643;Cluster-6081.14845;Cluster-6…	K00128|K06119|K13513|K14457|K14457|K01054|K15728|K00128|K00679|K07407|K07407|K07407|K00901|K14457|K14457|K01054|K01054|K01054|K00901|K00128|K00128|K13508|K13508|K13508|K00901|K01054|K11155|K01054|K11155|K00901|K13508|K03715|K15728|K00128|K00901|K07407|K07407|
Thiamine metabolism	ko00730	8	10	0.0573567	0.299253	Cluster-6081.14014;Cluster-6081.19629;Cluster-6081.23775;Cluster-6081.23776;Cluster-6081.15635;Cluster-6081.22148;Cluster-6081.22698;Cluster-6081.24654	K03147|K01662|K03146|K03146|K06928|K01662|K00949|K01662|
Phenylalanine metabolism	ko00360	20	38	0.0687266	0.329091	Cluster-6081.11183;Cluster-6081.30696;Cluster-6081.26374;Cluster-6081.22663;Cluster-6081.11499;Cluster-6081.14266;Cluster-6081.17269;Cluster-6081.16306;Cluster-6081.9026;Cluster-6081.8874;Cluster-6081.17533;Cluster-6081.15657;Cluster-6081.6844;Cluster-6081.15031;Cluster-6081.1089;Cluster-6081.11194;Cluster-6081.15223;Cluster-6081.8840;Cluster-6081.15846;Cluster-6081.7201	K00457|K01904|K01904|K10775|K00276|K00811|K15849|K01904|K01904|K01904|K00815|K10775|K00588|K00487|K01904|K00276|K10775|K00276|K10775|K01426|
Fatty acid degradation	ko00071	26	53	0.0711103	0.329091	Cluster-6081.15924;Cluster-6081.13229;Cluster-6081.25255;Cluster-6081.16871;Cluster-6081.19304;Cluster-6081.20213;Cluster-6081.20602;Cluster-6081.28846;Cluster-6081.19043;Cluster-6081.13765;Cluster-6081.11164;Cluster-6081.3637;Cluster-6081.4643;Cluster-6081.17227;Cluster-6081.14845;Cluster-6081.16196;Cluster-6081.17541;Cluster-6081.17542;Cluster-6081.21981;Cluster-6081.25361;Cluster-6081.15502;Cl…	K00128|K00121|K00121|K00128|K01897|K10527|K00121|K01897|K18857|K00128|K18857|K00121|K00128|K01897|K00128|K01897|K18857|K18857|K10527|K01897|K00121|K01897|K00626|K00232|K01897|K00232|
Glycine, serine and threonine metabolism	ko00260	37	81	0.0713029	0.329091	Cluster-6081.16711;Cluster-6081.9981;Cluster-6081.17762;Cluster-10004.0;Cluster-6081.22752;Cluster-6081.10902;Cluster-6081.17161;Cluster-6081.19113;Cluster-6081.8307;Cluster-6081.19378;Cluster-6081.8590;Cluster-6081.8964;Cluster-6081.25678;Cluster-6081.24086;Cluster-6081.16778;Cluster-6081.8840;Cluster-6081.5521;Cluster-6081.15053;Cluster-6081.30098;Cluster-4513.0;Cluster-6081.4195;Cluster-6081.2…	K00928|K02437|K01695|K01733|K00600|K01079|K00058|K15919|K00600|K00928|K01696|K00600|K15634|K00827|K12235|K00276|K00306|K00281|K01754|K00306|K06001|K01620|K01695|K01695|K00830|K00831|K00827|K14272|K00276|K02437|K15893|K00605|K00382|K15634|K15633|K00276|K12524|
Cysteine and methionine metabolism	ko00270	45	103	0.0798124	0.348063	Cluster-6081.16598;Cluster-6081.2934;Cluster-6081.15945;Cluster-6081.13220;Cluster-6081.24379;Cluster-3271.0;Cluster-6081.17533;Cluster-6081.17893;Cluster-6081.15684;Cluster-6081.15203;Cluster-6081.14384;Cluster-6081.16711;Cluster-6081.11387;Cluster-6081.11386;Cluster-6081.19378;Cluster-6081.17938;Cluster-6081.13644;Cluster-6081.22353;Cluster-11539.0;Cluster-6081.4092;Cluster-6081.24086;Cluster-1…	K00558|K01762|K01738|K00558|K00826|K13034|K00815|K00549|K00025|K00026|K00026|K00928|K05933|K05933|K00928|K00789|K05933|K01919|K01762|K00797|K00827|K01011|K00016|K00899|K00547|K00016|K01738|K00811|K00558|K00789|K05933|K01611|K08967|K00827|K01738|K00826|K00640|K13034|K05933|K01251|K00789|K01611|K01919|K12524|K00025|
Base excision repair	ko03410	22	44	0.0812147	0.348063	Cluster-6081.12385;Cluster-6081.13304;Cluster-10048.0;Cluster-2524.0;Cluster-6081.2952;Cluster-6081.18854;Cluster-6081.8231;Cluster-6081.8232;Cluster-6081.17782;Cluster-6081.17972;Cluster-6081.10172;Cluster-6081.14780;Cluster-6081.14966;Cluster-6081.15470;Cluster-6081.12688;Cluster-6081.18742;Cluster-6081.25584;Cluster-6081.15448;Cluster-6081.11590;Cluster-6081.3726;Cluster-6081.13690;Cluster-608…	K02328|K02326|K01246|K02335|K03648|K10798|K01246|K01246|K01142|K02324|K10798|K02325|K04802|K10747|K10773|K01142|K10798|K01246|K03575|K10773|K10798|K01246|
Tyrosine metabolism	ko00350	19	40	0.132	0.546206	Cluster-6081.11183;Cluster-6081.17541;Cluster-6081.26802;Cluster-6081.17542;Cluster-6081.25255;Cluster-6081.19043;Cluster-6081.14266;Cluster-6081.17269;Cluster-6081.3637;Cluster-6081.13229;Cluster-6081.15502;Cluster-6081.17533;Cluster-6081.11164;Cluster-6081.19984;Cluster-6081.11194;Cluster-6081.11499;Cluster-6081.8840;Cluster-6081.20602;Cluster-6081.29026	K00457|K18857|K00422|K18857|K00121|K18857|K00811|K15849|K00121|K00121|K00121|K00815|K18857|K01800|K00276|K00276|K00276|K00121|K01592|
Isoquinoline alkaloid biosynthesis	ko00950	9	16	0.150499	0.599134	Cluster-6081.26802;Cluster-6081.11499;Cluster-6081.14266;Cluster-6081.17269;Cluster-6081.17533;Cluster-6081.29026;Cluster-6081.740;Cluster-6081.11194;Cluster-6081.8840	K00422|K00276|K00811|K15849|K00815|K01592|K13384|K00276|K00276|
Fatty acid elongation	ko00062	15	31	0.154776	0.599134	Cluster-6081.9523;Cluster-6081.13814;Cluster-6081.21979;Cluster-6081.28081;Cluster-6081.20338;Cluster-6081.7013;Cluster-6081.782;Cluster-6081.14733;Cluster-6081.19008;Cluster-6081.11966;Cluster-6081.11729;Cluster-6081.2075;Cluster-5789.0;Cluster-6081.26523;Cluster-6081.30207	K15397|K10251|K15397|K15397|K15397|K10258|K10251|K10703|K15397|K01074|K15397|K10258|K15397|K10703|K15397|
Sesquiterpenoid and triterpenoid biosynthesis	ko00909	8	14	0.162612	0.602424	Cluster-6081.1851;Cluster-6081.27684;Cluster-6081.4886;Cluster-6081.1620;Cluster-6081.27683;Cluster-6081.28370;Cluster-8078.0;Cluster-6081.24358	K15803|K15813|K15813|K15803|K15813|K15814|K00801|K15813|
Carbon fixation in photosynthetic organisms	ko00710	30	71	0.165667	0.602424	Cluster-6081.17267;Cluster-6081.16206;Cluster-6081.15743;Cluster-6081.9013;Cluster-6081.15203;Cluster-6081.14384;Cluster-6081.15214;Cluster-6081.13852;Cluster-6081.19802;Cluster-6081.16417;Cluster-6081.21912;Cluster-6081.5655;Cluster-6081.2605;Cluster-6081.15867;Cluster-6081.18903;Cluster-6081.15684;Cluster-6081.15751;Cluster-6081.15505;Cluster-6081.9254;Cluster-6081.18749;Cluster-6081.13848;Clus…	K01595|K01595|K01595|K00029|K00026|K00026|K00615|K05298|K01006|K00025|K00028|K00927|K00029|K14272|K01807|K00025|K01602|K00927|K01595|K01595|K03841|K00134|K01006|K00134|K00051|K00927|K00855|K00028|K00028|K01623|
Tropane, piperidine and pyridine alkaloid biosynthesis	ko00960	12	25	0.195521	0.61566	Cluster-6081.11499;Cluster-6081.9709;Cluster-6081.14266;Cluster-6081.17269;Cluster-6081.1882;Cluster-6081.5301;Cluster-6081.2366;Cluster-6081.17533;Cluster-6081.11194;Cluster-6081.8840;Cluster-6081.27931;Cluster-6081.27930	K00276|K08081|K00811|K15849|K08081|K08081|K08081|K00815|K00276|K00276|K08081|K08081|
Ascorbate and aldarate metabolism	ko00053	20	46	0.196844	0.61566	Cluster-6081.22116;Cluster-6081.15924;Cluster-6081.24853;Cluster-6081.14578;Cluster-4956.0;Cluster-6081.13985;Cluster-6081.2022;Cluster-6081.14845;Cluster-6081.6755;Cluster-6081.13765;Cluster-6081.4643;Cluster-6081.16871;Cluster-6081.8784;Cluster-6081.9921;Cluster-6081.27392;Cluster-6081.7991;Cluster-6081.12769;Cluster-6081.1527;Cluster-6081.2039;Cluster-6081.6877	K00434|K00128|K00469|K00423|K12447|K10046|K12447|K00128|K16190|K00128|K00128|K00128|K18649|K00434|K12447|K10047|K00012|K12447|K00469|K12447|
Phenylalanine, tyrosine and tryptophan biosynthesis	ko00400	20	46	0.196844	0.61566	Cluster-6081.2916;Cluster-6081.12449;Cluster-6081.13270;Cluster-6081.24952;Cluster-6081.14266;Cluster-6081.17269;Cluster-6081.2568;Cluster-6081.17762;Cluster-6081.4195;Cluster-6081.16288;Cluster-6081.15088;Cluster-6081.12158;Cluster-6081.11622;Cluster-6081.8590;Cluster-6081.17533;Cluster-6081.29553;Cluster-6081.7611;Cluster-6081.6629;Cluster-6081.19966;Cluster-6081.22584	K01626|K01850|K05359|K01695|K00811|K15849|K01850|K01695|K06001|K05359|K01626|K05359|K01850|K01696|K00815|K13832|K01850|K01695|K13832|K01657|
Arachidonic acid metabolism	ko00590	8	15	0.197591	0.61566	Cluster-6081.2908;Cluster-6081.9336;Cluster-6081.25972;Cluster-6081.9345;Cluster-6081.9344;Cluster-6081.23249;Cluster-6081.19585;Cluster-6081.2169	K18592|K00432|K07418|K18592|K18592|K18592|K00432|K18592|
Glyoxylate and dicarboxylate metabolism	ko00630	32	79	0.205968	0.61566	Cluster-6081.9981;Cluster-6081.15533;Cluster-6081.14470;Cluster-6081.19011;Cluster-6081.22752;Cluster-6081.19012;Cluster-6081.19014;Cluster-6081.15203;Cluster-6081.14384;Cluster-6081.13588;Cluster-6081.16417;Cluster-6081.8964;Cluster-6081.1395;Cluster-6081.15867;Cluster-6081.11445;Cluster-6081.15053;Cluster-6081.15684;Cluster-6081.15751;Cluster-6081.30740;Cluster-6081.24950;Cluster-6081.3386;Clus…	K02437|K00122|K01915|K11517|K00600|K11517|K11517|K00026|K00026|K01915|K00025|K00600|K01637|K14272|K03781|K00281|K00025|K01602|K19269|K00626|K00830|K00600|K15919|K11517|K02437|K15893|K00605|K00382|K18121|K01647|K19269|K18121|
Monobactam biosynthesis	ko00261	7	13	0.215524	0.61566	Cluster-6081.12567;Cluster-6081.16711;Cluster-6081.11507;Cluster-6081.19378;Cluster-6081.4862;Cluster-6081.29172;Cluster-6081.13692	K13811|K00928|K01714|K00928|K01714|K01714|K12524|
Vitamin B6 metabolism	ko00750	7	13	0.215524	0.61566	Cluster-6081.19227;Cluster-10279.0;Cluster-6081.14161;Cluster-10004.0;Cluster-6081.12657;Cluster-6081.15351;Cluster-6081.24436	K13248|K13248|K06215|K01733|K13248|K00831|K13248|
DNA replication	ko03030	22	53	0.230774	0.61566	Cluster-6081.15162;Cluster-6081.12385;Cluster-6081.8754;Cluster-6081.14191;Cluster-6081.13304;Cluster-2524.0;Cluster-6081.19065;Cluster-6081.15470;Cluster-6081.17972;Cluster-6081.21393;Cluster-6081.13641;Cluster-6081.17772;Cluster-6081.14780;Cluster-6081.14966;Cluster-6081.14409;Cluster-6081.15391;Cluster-6081.11845;Cluster-6081.15261;Cluster-6081.4813;Cluster-6081.10122;Cluster-6081.24659;Cluste…	K02540|K02328|K10743|K02210|K02326|K02335|K02684|K10747|K02324|K02685|K02320|K10740|K02325|K04802|K02209|K02212|K10744|K07466|K10756|K10755|K10756|K02541|
Glycolysis / Gluconeogenesis	ko00010	49	128	0.230974	0.61566	Cluster-6081.15924;Cluster-6081.15704;Cluster-6081.13229;Cluster-6081.25255;Cluster-6081.14665;Cluster-6081.16871;Cluster-6081.12278;Cluster-6081.15505;Cluster-6081.20602;Cluster-6081.12149;Cluster-6081.12440;Cluster-6081.21406;Cluster-6081.19043;Cluster-6081.23978;Cluster-6081.13765;Cluster-6081.11164;Cluster-6081.3637;Cluster-6081.4643;Cluster-6081.14845;Cluster-6081.25678;Cluster-6081.5655;Clu…	K00128|K01792|K00121|K00121|K00844|K00128|K00627|K00927|K00121|K00016|K00844|K01568|K18857|K01785|K00128|K18857|K00121|K00128|K00128|K15634|K00927|K18857|K18857|K00016|K01792|K01792|K00873|K01689|K00895|K00121|K00873|K01792|K01835|K00134|K01895|K01689|K03841|K00873|K01810|K00850|K01810|K00134|K00627|K00927|K00382|K15634|K15633|K00850|K01623|
Pyruvate metabolism	ko00620	39	100	0.231583	0.61566	Cluster-6081.15924;Cluster-6081.17267;Cluster-6081.16206;Cluster-6081.15743;Cluster-11878.0;Cluster-6081.12278;Cluster-6081.9013;Cluster-6081.15203;Cluster-6081.19802;Cluster-6081.14384;Cluster-6081.15889;Cluster-6081.13765;Cluster-6081.20843;Cluster-6081.14841;Cluster-6081.4643;Cluster-6081.16417;Cluster-6081.14845;Cluster-6081.21912;Cluster-6081.2605;Cluster-6081.12149;Cluster-6081.15140;Cluste…	K00128|K01595|K01595|K01595|K00016|K00627|K00029|K00026|K01006|K00026|K00051|K00128|K18881|K01759|K00128|K00025|K00128|K00028|K00029|K00016|K11262|K00025|K01759|K00873|K01963|K00873|K00626|K01595|K01595|K01895|K01759|K00873|K01006|K00627|K00382|K00028|K00128|K00028|K01759|
Biosynthesis of unsaturated fatty acids	ko01040	13	29	0.235427	0.61566	Cluster-6081.13814;Cluster-6081.15663;Cluster-6081.15183;Cluster-6081.7013;Cluster-6081.782;Cluster-6081.14733;Cluster-11021.0;Cluster-6081.26560;Cluster-6081.10918;Cluster-6081.2075;Cluster-6081.26523;Cluster-6081.4603;Cluster-6081.5281	K10251|K03921|K00059|K10258|K10251|K10703|K03921|K03921|K00232|K10258|K10703|K10256|K00232|
Riboflavin metabolism	ko00740	6	11	0.236003	0.61566	Cluster-6081.19235;Cluster-6081.21467;Cluster-6081.16278;Cluster-6081.18412;Cluster-6081.19823;Cluster-6081.18687	K14652|K14652|K14652|K11752|K11752|K14652|
Glycosphingolipid biosynthesis - globo series	ko00603	6	11	0.236003	0.61566	Cluster-6081.14997;Cluster-6081.23326;Cluster-6081.21520;Cluster-6081.27176;Cluster-6081.27175;Cluster-6081.27174	K07407|K07407|K12373|K07407|K07407|K07407|
Stilbenoid, diarylheptanoid and gingerol biosynthesis	ko00945	8	17	0.275191	0.69208	Cluster-6081.8248;Cluster-6081.5473;Cluster-6081.8247;Cluster-6081.16343;Cluster-6081.4651;Cluster-6081.15487;Cluster-6081.15031;Cluster-6081.6844	K13065|K13065|K13065|K13065|K16040|K13065|K00487|K00588|
Sphingolipid metabolism	ko00600	11	25	0.276832	0.69208	Cluster-6081.12831;Cluster-6081.18512;Cluster-6081.6625;Cluster-6081.3071;Cluster-6081.14997;Cluster-6081.15996;Cluster-6081.23326;Cluster-6081.4123;Cluster-6081.27176;Cluster-6081.27175;Cluster-6081.27174	K01190|K04713|K04718|K01634|K07407|K12349|K07407|K04712|K07407|K07407|K07407|
Zeatin biosynthesis	ko00908	6	12	0.284064	0.695668	Cluster-6081.1945;Cluster-6081.22390;Cluster-6081.10824;Cluster-6081.5073;Cluster-6081.4852;Cluster-6081.12993	K10760|K10760|K13495|K00279|K13495|K00279|
Lysine biosynthesis	ko00300	7	15	0.302343	0.711793	Cluster-6081.4862;Cluster-6081.10788;Cluster-6081.16711;Cluster-6081.11507;Cluster-6081.19378;Cluster-6081.29172;Cluster-6081.13692	K01714|K10206|K00928|K01714|K00928|K01714|K12524|
Alanine, aspartate and glutamate metabolism	ko00250	23	59	0.302512	0.711793	Cluster-6081.14416;Cluster-6081.13137;Cluster-6081.18813;Cluster-6081.14470;Cluster-6081.24949;Cluster-6081.12294;Cluster-6081.14287;Cluster-6081.13588;Cluster-6081.18085;Cluster-6081.25861;Cluster-6081.24086;Cluster-6081.13363;Cluster-6081.15867;Cluster-6081.4049;Cluster-6081.14266;Cluster-6081.24955;Cluster-6081.27794;Cluster-6081.3386;Cluster-6081.2337;Cluster-6081.19174;Cluster-6081.12770;Clu…	K01955|K00261|K01580|K01915|K00764|K01940|K01755|K01915|K00294|K17761|K00827|K16871|K14272|K00820|K00811|K01953|K00278|K00830|K00827|K17761|K01580|K00264|K00820|
Monoterpenoid biosynthesis	ko00902	5	10	0.315007	0.725658	Cluster-6081.14838;Cluster-12194.0;Cluster-9194.0;Cluster-6081.15763;Cluster-6081.18473	K15095|K15095|K15095|K15095|K15095|
Peroxisome	ko04146	29	77	0.32495	0.725658	Cluster-6081.14435;Cluster-6081.7963;Cluster-6081.27953;Cluster-6081.10918;Cluster-6081.11911;Cluster-6081.7483;Cluster-6081.19304;Cluster-6081.19011;Cluster-6081.19012;Cluster-6081.19014;Cluster-6081.16301;Cluster-6081.1316;Cluster-6081.17227;Cluster-4513.0;Cluster-6081.16196;Cluster-6081.5521;Cluster-6081.11445;Cluster-6081.28846;Cluster-6081.1793;Cluster-6081.25361;Cluster-6081.23633;Cluster-6…	K13341|K13348|K13347|K00232|K13356|K13345|K01897|K11517|K11517|K11517|K00031|K13356|K01897|K00306|K01897|K00306|K03781|K01897|K13356|K01897|K01897|K13347|K00830|K13348|K11517|K13337|K01897|K04564|K00232|
Terpenoid backbone biosynthesis	ko00900	19	49	0.333261	0.725658	Cluster-6081.17299;Cluster-6081.19629;Cluster-6081.1647;Cluster-6081.22148;Cluster-6081.13529;Cluster-6081.5447;Cluster-6081.26197;Cluster-12337.0;Cluster-6081.20782;Cluster-6081.29093;Cluster-6081.6125;Cluster-6081.24950;Cluster-6081.13890;Cluster-6081.18934;Cluster-6081.1326;Cluster-9423.0;Cluster-6081.20634;Cluster-6081.5932;Cluster-6081.24654	K00787|K01662|K11778|K01662|K10960|K05955|K01770|K11778|K11778|K11778|K13789|K00626|K01597|K13789|K11778|K13789|K05954|K13789|K01662|
Sulfur metabolism	ko00920	14	35	0.334425	0.725658	Cluster-3271.0;Cluster-6081.13613;Cluster-6081.12567;Cluster-6081.13438;Cluster-6081.15945;Cluster-6081.15089;Cluster-6081.24347;Cluster-6081.17724;Cluster-6081.3917;Cluster-6081.22103;Cluster-12016.0;Cluster-6081.12044;Cluster-6081.9877;Cluster-6081.6685	K13034|K01738|K13811|K00640|K01738|K05907|K01738|K00392|K01082|K13034|K01011|K00860|K08738|K01082|
Amino sugar and nucleotide sugar metabolism	ko00520	51	141	0.33864	0.725658	Cluster-6081.5464;Cluster-6081.11547;Cluster-11676.0;Cluster-6081.13985;Cluster-6081.14665;Cluster-6081.25207;Cluster-6081.17147;Cluster-6081.19348;Cluster-6081.21340;Cluster-6081.16011;Cluster-6081.27392;Cluster-6081.21520;Cluster-6081.26364;Cluster-6081.11109;Cluster-6081.15193;Cluster-6081.12769;Cluster-6081.14906;Cluster-6081.4663;Cluster-6081.7311;Cluster-11666.0;Cluster-6081.2213;Cluster-60…	K01183|K00975|K12449|K10046|K00844|K01183|K00847|K00847|K18677|K00963|K12447|K12373|K01183|K00966|K01183|K00012|K13379|K00847|K12448|K00975|K13379|K00326|K01784|K00820|K13379|K00844|K00770|K01183|K13648|K01711|K01835|K15920|K00963|K08678|K13648|K13648|K01183|K01810|K17497|K12447|K13648|K12450|K01810|K12447|K01183|K16190|K12447|K00820|K00975|K00975|K12447|
Pantothenate and CoA biosynthesis	ko00770	11	27	0.346574	0.72963	Cluster-6081.18274;Cluster-6081.2287;Cluster-6081.2018;Cluster-6081.12956;Cluster-6081.2017;Cluster-6081.1708;Cluster-6081.13961;Cluster-6081.8602;Cluster-6081.24379;Cluster-6081.10010;Cluster-6081.18129	K01464|K00826|K01464|K01687|K01464|K09680|K01652|K00606|K00826|K09680|K01464|
Nitrogen metabolism	ko00910	15	39	0.37071	0.744596	Cluster-6081.20446;Cluster-6081.27301;Cluster-6081.13137;Cluster-6081.13588;Cluster-6081.17812;Cluster-6081.5955;Cluster-6081.14470;Cluster-12316.0;Cluster-6081.3542;Cluster-6081.1180;Cluster-11756.0;Cluster-6081.1926;Cluster-6081.3621;Cluster-6081.4207;Cluster-6081.28409	K01674|K01673|K00261|K01915|K00264|K01674|K01915|K01673|K00366|K02575|K01674|K01673|K01674|K02575|K01673|
Limonene and pinene degradation	ko00903	5	11	0.371488	0.744596	Cluster-6081.13765;Cluster-6081.15924;Cluster-6081.4643;Cluster-6081.16871;Cluster-6081.14845	K00128|K00128|K00128|K00128|K00128|
Circadian rhythm - plant	ko04712	16	42	0.375225	0.744596	Cluster-6081.23696;Cluster-9179.0;Cluster-1722.0;Cluster-6081.11652;Cluster-4559.0;Cluster-6081.15400;Cluster-6081.15005;Cluster-6081.15334;Cluster-6081.1965;Cluster-11086.0;Cluster-6081.5834;Cluster-2289.0;Cluster-6081.15025;Cluster-6081.28436;Cluster-6081.7326;Cluster-6081.14685	K12127|K12126|K12127|K00660|K00660|K00660|K12121|K00660|K00660|K16223|K00660|K16166|K12118|K12129|K12125|K00660|
Fatty acid biosynthesis	ko00061	17	45	0.379324	0.744596	Cluster-6081.28846;Cluster-6081.15140;Cluster-6081.13912;Cluster-6081.17227;Cluster-6081.15663;Cluster-6081.26353;Cluster-6081.15183;Cluster-6081.25361;Cluster-6081.23633;Cluster-6081.8505;Cluster-6081.20165;Cluster-11021.0;Cluster-6081.26560;Cluster-6081.19304;Cluster-6081.16196;Cluster-6081.14059;Cluster-6081.18307	K01897|K11262|K09458|K01897|K03921|K01897|K00059|K01897|K01897|K00648|K01963|K03921|K03921|K01897|K01897|K00208|K02372|
Other glycan degradation	ko00511	6	14	0.384708	0.744596	Cluster-6081.12831;Cluster-6081.7102;Cluster-6081.11646;Cluster-6081.17196;Cluster-6081.21520;Cluster-6081.20627	K01190|K01191|K01191|K01191|K12373|K01191|
Porphyrin and chlorophyll metabolism	ko00860	15	40	0.401279	0.764341	Cluster-6081.31074;Cluster-6081.15409;Cluster-6081.12887;Cluster-6081.7641;Cluster-6081.12664;Cluster-6081.13529;Cluster-6081.26865;Cluster-6081.7275;Cluster-6081.14958;Cluster-6081.12144;Cluster-12318.0;Cluster-6081.9348;Cluster-6081.16467;Cluster-6081.7039;Cluster-6081.19106	K03405|K03403|K01772|K03405|K04035|K10960|K08099|K02492|K02492|K01599|K08099|K13606|K19073|K03404|K13071|
Valine, leucine and isoleucine degradation	ko00280	21	58	0.418317	0.774896	Cluster-6081.2337;Cluster-6081.15924;Cluster-6081.11001;Cluster-6081.2287;Cluster-6081.1870;Cluster-6081.13765;Cluster-6081.20321;Cluster-6081.20320;Cluster-6081.9984;Cluster-6081.15880;Cluster-6081.24379;Cluster-6081.22228;Cluster-6081.4643;Cluster-6081.1102;Cluster-6081.24950;Cluster-6081.16871;Cluster-6081.22227;Cluster-6081.24086;Cluster-6081.14845;Cluster-6081.12941;Cluster-6081.12043	K00827|K00128|K05605|K00826|K00020|K00128|K18660|K18660|K09699|K05605|K00826|K05605|K00128|K00167|K00626|K00128|K05605|K00827|K00128|K00382|K00140|
Glycerophospholipid metabolism	ko00564	37	105	0.421901	0.774896	Cluster-6081.6393;Cluster-6081.12479;Cluster-6081.14335;Cluster-6081.9659;Cluster-6081.2549;Cluster-11715.0;Cluster-6081.6485;Cluster-6081.11105;Cluster-6081.25559;Cluster-6081.8657;Cluster-6081.30324;Cluster-1108.0;Cluster-4669.0;Cluster-6081.9852;Cluster-6081.4630;Cluster-6081.4631;Cluster-6081.7197;Cluster-6081.30729;Cluster-6081.13232;Cluster-6081.5245;Cluster-6081.9155;Cluster-6081.18667;Clu…	K01115|K13513|K15728|K00901|K06130|K01115|K14156|K00901|K06130|K13508|K13508|K01115|K13508|K00550|K00006|K00006|K06129|K00901|K05929|K01115|K05929|K00111|K01115|K14156|K13510|K01115|K00901|K13508|K01115|K14156|K01115|K15728|K01115|K00901|K01517|K00993|K00006|
Lysine degradation	ko00310	13	35	0.426193	0.774896	Cluster-6081.15924;Cluster-6081.12526;Cluster-6081.13765;Cluster-6081.8516;Cluster-6081.4643;Cluster-6081.16871;Cluster-6081.24950;Cluster-4513.0;Cluster-6081.14845;Cluster-6081.21120;Cluster-6081.27141;Cluster-6081.5521;Cluster-6081.15920	K00128|K11420|K00128|K18826|K00128|K00128|K00626|K00306|K00128|K11420|K14157|K00306|K11423|
beta-Alanine metabolism	ko00410	21	59	0.444117	0.795433	Cluster-6081.15924;Cluster-6081.18274;Cluster-6081.11001;Cluster-6081.11499;Cluster-6081.12770;Cluster-6081.6552;Cluster-6081.13765;Cluster-6081.18813;Cluster-6081.2018;Cluster-6081.2017;Cluster-6081.15880;Cluster-6081.18129;Cluster-6081.22228;Cluster-6081.4643;Cluster-6081.16871;Cluster-6081.14845;Cluster-6081.4092;Cluster-6081.22227;Cluster-6081.11194;Cluster-6081.8840;Cluster-6081.12043	K00128|K01464|K05605|K00276|K01580|K12259|K00128|K01580|K01464|K01464|K05605|K01464|K05605|K00128|K00128|K00128|K00797|K05605|K00276|K00276|K00140|
Isoflavonoid biosynthesis	ko00943	4	10	0.480384	0.847737	Cluster-6081.22570;Cluster-6081.18319;Cluster-6081.15778;Cluster-6081.15777	K13265|K13260|K13260|K13260|
Histidine metabolism	ko00340	9	25	0.489261	0.85089	Cluster-6081.15924;Cluster-6081.2685;Cluster-6081.10626;Cluster-6081.13765;Cluster-6081.4643;Cluster-6081.16871;Cluster-6081.8784;Cluster-6081.14845;Cluster-6081.11848	K00128|K01590|K01814|K00128|K00128|K00128|K18649|K00128|K01590|
Purine metabolism	ko00230	57	170	0.517221	0.886665	Cluster-6081.20019;Cluster-6081.12385;Cluster-6081.15385;Cluster-6081.13304;Cluster-6081.22181;Cluster-6081.22180;Cluster-2524.0;Cluster-6081.6517;Cluster-6081.24949;Cluster-6081.4637;Cluster-6081.15209;Cluster-6081.17891;Cluster-6081.13641;Cluster-6081.18141;Cluster-6081.17972;Cluster-6081.12044;Cluster-6081.2445;Cluster-6081.22070;Cluster-6081.14289;Cluster-6081.19065;Cluster-6081.14388;Cluster…	K02083|K02328|K01490|K02326|K19964|K19964|K02335|K00939|K00764|K18532|K03006|K11808|K02320|K03012|K02324|K00860|K01490|K03027|K10807|K02684|K00940|K01488|K06928|K02325|K01951|K00962|K01522|K00759|K03046|K00759|K03021|K13811|K01522|K03013|K00873|K18151|K00939|K00873|K01923|K19964|K01835|K01081|K01952|K10808|K14641|K00873|K19964|K10808|K01490|K02685|K01490|K01517|K19964|K14641|K14977|K01488|K14641|
Plant-pathogen interaction	ko04626	57	171	0.532626	0.900213	Cluster-6081.3279;Cluster-6081.11009;Cluster-6081.5541;Cluster-3176.0;Cluster-11415.0;Cluster-6081.21493;Cluster-6081.1498;Cluster-6081.8217;Cluster-6081.20237;Cluster-6081.20687;Cluster-12239.0;Cluster-6081.28235;Cluster-6081.9442;Cluster-6081.12089;Cluster-6081.26948;Cluster-6081.30867;Cluster-6081.28932;Cluster-6081.24380;Cluster-6081.19631;Cluster-6081.19776;Cluster-6081.21684;Cluster-6081.28…	K13448|K13448|K04079|K13447|K05391|K13448|K13420|K13448|K04079|K13416|K05391|K05391|K18875|K05391|K13420|K13424|K13448|K13458|K13414|K04368|K13448|K02183|K13412|K13447|K13457|K13424|K13416|K13412|K13425|K13448|K13416|K09487|K13447|K13412|K13412|K13416|K13448|K13457|K13412|K13447|K13448|K13448|K13457|K13457|K13447|K05391|K13448|K13412|K05391|K13430|K13448|K13434|K05391|K13448|K13448|K13457|K13448|
Inositol phosphate metabolism	ko00562	20	60	0.547068	0.902391	Cluster-6081.172;Cluster-6081.8398;Cluster-6081.8784;Cluster-10252.0;Cluster-6081.3939;Cluster-6081.6394;Cluster-6081.19964;Cluster-6081.25892;Cluster-6081.225;Cluster-6081.26956;Cluster-6081.24697;Cluster-6081.24853;Cluster-6081.12413;Cluster-5093.0;Cluster-6081.2039;Cluster-6081.24284;Cluster-6081.7991;Cluster-6081.2046;Cluster-6081.12043;Cluster-12434.0	K05857|K00889|K18649|K05857|K05857|K01110|K05857|K00889|K00889|K05857|K05857|K00469|K00889|K00914|K00469|K19517|K10047|K00889|K00140|K00913|
Lipoic acid metabolism	ko00785	2	5	0.556303	0.902391	Cluster-6081.21651;Cluster-2118.0	K03801|K03801|
Mismatch repair	ko03430	13	39	0.556474	0.902391	Cluster-6081.17479;Cluster-6081.12385;Cluster-6081.15261;Cluster-6081.17772;Cluster-6081.4813;Cluster-6081.10122;Cluster-6081.13416;Cluster-6081.24659;Cluster-6081.8464;Cluster-6081.4318;Cluster-6081.14966;Cluster-6081.16352;Cluster-6081.15470	K07456|K02328|K07466|K10740|K10756|K10755|K10746|K10756|K10746|K08736|K04802|K08737|K10747|
Butanoate metabolism	ko00650	9	27	0.566519	0.906431	Cluster-6081.19174;Cluster-6081.12770;Cluster-6081.18813;Cluster-6081.13961;Cluster-6081.25861;Cluster-6081.16408;Cluster-6081.24950;Cluster-6081.13363;Cluster-6081.16897	K17761|K01580|K01580|K01652|K17761|K18121|K00626|K16871|K18121|
Biotin metabolism	ko00780	6	18	0.580132	0.911095	Cluster-6081.13912;Cluster-6081.15183;Cluster-6081.14059;Cluster-6081.14052;Cluster-6081.22140;Cluster-6081.18307	K09458|K00059|K00208|K01012|K19562|K02372|
Propanoate metabolism	ko00640	14	43	0.58462	0.911095	Cluster-6081.11001;Cluster-11878.0;Cluster-6081.15140;Cluster-6081.9984;Cluster-6081.15880;Cluster-6081.12941;Cluster-6081.20165;Cluster-6081.1102;Cluster-6081.24950;Cluster-6081.22227;Cluster-6081.22228;Cluster-6081.12043;Cluster-6081.14772;Cluster-6081.12149	K05605|K00016|K11262|K09699|K05605|K00382|K01963|K00167|K00626|K05605|K05605|K00140|K01895|K00016|
Steroid biosynthesis	ko00100	8	25	0.608867	0.936719	Cluster-6081.13627;Cluster-6081.1470;Cluster-6081.15405;Cluster-6081.12339;Cluster-6081.16729;Cluster-8078.0;Cluster-6081.9431;Cluster-6081.14494	K01052|K09832|K01853|K00559|K05917|K00801|K00222|K01824|
Arginine biosynthesis	ko00220	11	35	0.626528	0.951688	Cluster-6081.16284;Cluster-6081.14266;Cluster-6081.14287;Cluster-6081.13588;Cluster-6081.13137;Cluster-6081.3789;Cluster-6081.14470;Cluster-6081.14096;Cluster-6081.15867;Cluster-6081.12294;Cluster-6081.20179	K00611|K00811|K01755|K01915|K00261|K01476|K01915|K14682|K14272|K01940|K01438|
One carbon pool by folate	ko00670	7	23	0.654456	0.97396	Cluster-6081.19169;Cluster-6081.24303;Cluster-6081.19610;Cluster-6081.8964;Cluster-6081.18366;Cluster-6081.22752;Cluster-6081.8307	K01938|K00297|K13998|K00600|K00605|K00600|K00600|
Ether lipid metabolism	ko00565	11	36	0.657423	0.97396	Cluster-6081.16448;Cluster-11715.0;Cluster-6081.18343;Cluster-6081.6393;Cluster-4717.0;Cluster-6081.5245;Cluster-6081.6955;Cluster-6081.11571;Cluster-1108.0;Cluster-6081.23812;Cluster-6081.13711	K01115|K01115|K01115|K01115|K01115|K01115|K01115|K00993|K01115|K13510|K01115|
Fructose and mannose metabolism	ko00051	18	59	0.675172	0.981106	Cluster-6081.13848;Cluster-6081.11109;Cluster-6081.5449;Cluster-6081.2331;Cluster-6081.19348;Cluster-6081.12440;Cluster-6476.0;Cluster-6081.14598;Cluster-6081.14665;Cluster-6081.17147;Cluster-6081.4663;Cluster-6081.9258;Cluster-6081.21353;Cluster-6081.10740;Cluster-6081.13530;Cluster-6081.23385;Cluster-6081.4975;Cluster-6081.20858	K03841|K00966|K19355|K00850|K00847|K00844|K19355|K00895|K00844|K00847|K00847|K01711|K19355|K00850|K01623|K01805|K19355|K17497|
Valine, leucine and isoleucine biosynthesis	ko00290	5	17	0.678598	0.981106	Cluster-6081.2287;Cluster-6081.13961;Cluster-6081.12956;Cluster-6081.30098;Cluster-6081.24379	K00826|K01652|K01687|K01754|K00826|
Cell cycle - Caulobacter	ko04112	6	21	0.703327	0.992932	Cluster-6081.19872;Cluster-6081.19871;Cluster-6081.17755;Cluster-6081.25251;Cluster-6081.14090;Cluster-6081.15557	K01338|K01338|K03531|K01338|K03531|K03531|
Glycosaminoglycan degradation	ko00531	6	21	0.703327	0.992932	Cluster-6081.23774;Cluster-6081.9198;Cluster-6081.9047;Cluster-6081.5149;Cluster-6081.21520;Cluster-6081.9696	K10532|K10532|K07964|K10532|K12373|K01205|
Arginine and proline metabolism	ko00330	24	82	0.75094	1	Cluster-6081.15924;Cluster-6081.20299;Cluster-6081.16871;Cluster-6081.15346;Cluster-6081.1981;Cluster-6081.13765;Cluster-6081.5870;Cluster-6081.18085;Cluster-6081.15196;Cluster-6081.4643;Cluster-6081.14845;Cluster-6081.4092;Cluster-6081.11413;Cluster-6081.14266;Cluster-6081.3789;Cluster-10571.0;Cluster-266.1;Cluster-6081.24759;Cluster-6081.6552;Cluster-6081.6596;Cluster-6081.6595;Cluster-1253.1;C…	K00128|K00472|K00128|K12657|K01583|K00128|K01611|K00294|K01583|K00128|K00128|K00797|K12657|K00811|K01476|K01611|K12251|K00318|K12259|K00472|K00472|K12251|K00472|K01426|
Pentose phosphate pathway	ko00030	14	52	0.804569	1	Cluster-6081.13848;Cluster-6081.18903;Cluster-6081.19051;Cluster-6081.11520;Cluster-6081.2331;Cluster-6081.19052;Cluster-6081.15214;Cluster-6081.14598;Cluster-6081.4986;Cluster-6081.15352;Cluster-6081.14490;Cluster-6081.13530;Cluster-6081.10740;Cluster-6081.9252	K03841|K01807|K01810|K00616|K00850|K01810|K00615|K00895|K01057|K01835|K00036|K01623|K00850|K00036|
Pyrimidine metabolism	ko00240	41	141	0.809251	1	Cluster-6081.14416;Cluster-6081.12385;Cluster-6081.15801;Cluster-6081.13304;Cluster-6081.19065;Cluster-2524.0;Cluster-6081.17414;Cluster-6081.15209;Cluster-6081.18141;Cluster-6081.18274;Cluster-6081.22070;Cluster-6081.14289;Cluster-6081.2017;Cluster-6081.14388;Cluster-6081.13641;Cluster-6081.14780;Cluster-6081.19610;Cluster-6081.26150;Cluster-6081.2603;Cluster-6081.2611;Cluster-6081.12030;Cluster…	K01955|K02328|K01937|K02326|K02684|K02335|K01937|K03006|K03012|K01464|K03027|K10807|K01464|K00940|K02320|K02325|K13998|K00962|K03046|K03021|K03013|K01464|K02324|K01489|K13421|K01493|K16904|K00384|K01081|K10808|K14641|K10808|K00761|K00857|K13421|K01464|K02685|K01240|K16329|K14641|K14641|
Folate biosynthesis	ko00790	4	17	0.809937	1	Cluster-6081.19610;Cluster-6081.9527;Cluster-6081.25086;Cluster-6081.21726	K13998|K18482|K01930|K01307|
Nucleotide excision repair	ko03420	19	70	0.823693	1	Cluster-6081.3014;Cluster-6081.17972;Cluster-6081.18486;Cluster-6081.12385;Cluster-6081.15261;Cluster-6081.17772;Cluster-6081.18361;Cluster-6081.7138;Cluster-6081.13304;Cluster-6081.10122;Cluster-6081.24659;Cluster-2524.0;Cluster-6081.26249;Cluster-6081.18549;Cluster-6081.14780;Cluster-6081.4813;Cluster-6081.14966;Cluster-6081.7522;Cluster-6081.15470	K10843|K02324|K10610|K02328|K07466|K10740|K03144|K10610|K02326|K10755|K10756|K02335|K10844|K03868|K02325|K10756|K04802|K10609|K10747|
Endocytosis	ko04144	87	292	0.846024	1	Cluster-6081.23239;Cluster-6081.29063;Cluster-11004.1;Cluster-6081.7606;Cluster-639.0;Cluster-6081.1575;Cluster-6081.28908;Cluster-6081.11924;Cluster-6081.8321;Cluster-6081.22740;Cluster-11047.0;Cluster-4717.0;Cluster-6081.1467;Cluster-950.0;Cluster-6081.6071;Cluster-6081.3370;Cluster-3212.0;Cluster-6081.6393;Cluster-6081.21059;Cluster-6081.31216;Cluster-3338.0;Cluster-6081.22007;Cluster-6081.141…	K07904|K01528|K01528|K07904|K01528|K18442|K19476|K18443|K18442|K12191|K03283|K01115|K01528|K01528|K03283|K03283|K01528|K01115|K17917|K01528|K03283|K03283|K03283|K01528|K12486|K12483|K07904|K01528|K03283|K01115|K03283|K01528|K19476|K10364|K01528|K01528|K03283|K01528|K18468|K01528|K03283|K01528|K01528|K12185|K03283|K01528|K00889|K00889|K12191|K12493|K12471|K01528|K12489|K07937|K01528|K19476|K00889|…
Homologous recombination	ko03440	13	51	0.847021	1	Cluster-6081.18607;Cluster-6081.12913;Cluster-6081.12385;Cluster-6081.15261;Cluster-6081.17772;Cluster-6081.12631;Cluster-6081.18287;Cluster-2524.0;Cluster-6081.14786;Cluster-6081.19066;Cluster-6081.14307;Cluster-6081.21078;Cluster-6081.13161	K10875|K10875|K02328|K07466|K10740|K10870|K10879|K02335|K10875|K10901|K10875|K10875|K08775|
Regulation of autophagy	ko04140	9	37	0.849371	1	Cluster-6081.10588;Cluster-6081.18247;Cluster-6081.9672;Cluster-6081.9994;Cluster-6081.15182;Cluster-5093.0;Cluster-6081.16597;Cluster-6081.25151;Cluster-6081.2956	K07198|K08337|K17888|K08341|K07198|K00914|K08341|K07198|K07198|
SNARE interactions in vesicular transport	ko04130	10	41	0.856728	1	Cluster-6081.4244;Cluster-6081.29494;Cluster-6081.18270;Cluster-6081.6201;Cluster-6081.9927;Cluster-6081.19717;Cluster-6081.6808;Cluster-6081.21360;Cluster-6081.20750;Cluster-6081.14965	K08506|K08486|K08498|K08486|K08493|K08486|K08495|K08515|K08503|K08486|
N-Glycan biosynthesis	ko00510	11	45	0.863731	1	Cluster-6081.7733;Cluster-6081.12665;Cluster-6081.17494;Cluster-6081.10195;Cluster-6081.3776;Cluster-6081.15387;Cluster-6081.5608;Cluster-6081.13502;Cluster-6081.2184;Cluster-6081.15376;Cluster-6081.15606	K07432|K12666|K12666|K01228|K00737|K12670|K03849|K12667|K00737|K12667|K05546|
Nicotinate and nicotinamide metabolism	ko00760	5	23	0.866186	1	Cluster-6081.9478;Cluster-6081.27794;Cluster-6081.7036;Cluster-6081.15732;Cluster-6081.5218	K01081|K00278|K06210|K03517|K01240|
Glycosphingolipid biosynthesis - ganglio series	ko00604	1	6	0.867202	1	Cluster-6081.21520	K12373|
Synthesis and degradation of ketone bodies	ko00072	1	7	0.900489	1	Cluster-6081.24950	K00626|
Selenocompound metabolism	ko00450	4	22	0.920874	1	Cluster-6081.6085;Cluster-6081.12567;Cluster-6081.17893;Cluster-6081.22650	K00384|K13811|K00549|K01874|
Phagosome	ko04145	27	107	0.924639	1	Cluster-6081.23199;Cluster-6081.22730;Cluster-6081.23211;Cluster-6081.14258;Cluster-6081.15764;Cluster-6081.27766;Cluster-6081.19375;Cluster-6081.15257;Cluster-6081.4399;Cluster-6081.19049;Cluster-6081.10398;Cluster-5093.0;Cluster-6081.16437;Cluster-6081.18398;Cluster-6081.12429;Cluster-6081.15403;Cluster-6081.23777;Cluster-6081.14226;Cluster-6081.17869;Cluster-6081.14100;Cluster-6081.16933;Clust…	K07375|K10956|K07374|K04392|K08054|K02150|K07375|K07374|K02153|K09481|K04392|K00914|K07375|K07375|K07375|K07374|K07375|K07375|K07897|K07375|K07374|K04392|K07375|K04392|K01365|K09481|K07375|
C5-Branched dibasic acid metabolism	ko00660	1	8	0.925434	1	Cluster-6081.13961	K01652|
Sulfur relay system	ko04122	1	8	0.925434	1	Cluster-12016.0	K01011|
Non-homologous end-joining	ko03450	1	9	0.944128	1	Cluster-2160.0	K10777|
Other types of O-glycan biosynthesis	ko00514	1	10	0.958137	1	Cluster-6081.3857	K09667|
Ubiquitin mediated proteolysis	ko04120	40	159	0.95895	1	Cluster-6081.21015;Cluster-6081.19442;Cluster-6081.22434;Cluster-6081.2951;Cluster-6081.17602;Cluster-6081.6418;Cluster-6081.26723;Cluster-6081.7522;Cluster-6081.14042;Cluster-6081.6373;Cluster-6081.17800;Cluster-6081.2787;Cluster-6081.18549;Cluster-6081.24088;Cluster-6081.14925;Cluster-6081.4584;Cluster-6081.10031;Cluster-6081.4720;Cluster-6081.16700;Cluster-6081.20337;Cluster-6081.12465;Cluster…	K10589|K04506|K10592|K03094|K03355|K04506|K03350|K10609|K04554|K10576|K10581|K03869|K03868|K10575|K06688|K10581|K03363|K10144|K03348|K10598|K06688|K03875|K10576|K03875|K03347|K10590|K10688|K10610|K03354|K04506|K10581|K04506|K10610|K03355|K10589|K03364|K04506|K10581|K10592|K04506|
Glycosylphosphatidylinositol(GPI)-anchor biosynthesis	ko00563	4	26	0.963214	1	Cluster-6081.17716;Cluster-6081.20375;Cluster-6081.17028;Cluster-6081.8882	K05286|K05310|K05285|K03857|
Protein processing in endoplasmic reticulum	ko04141	75	282	0.970088	1	Cluster-6081.15678;Cluster-6081.1212;Cluster-6081.5541;Cluster-6081.939;Cluster-6081.11185;Cluster-6081.97;Cluster-6081.22730;Cluster-6081.17470;Cluster-6081.21859;Cluster-6081.1127;Cluster-11842.0;Cluster-6081.27179;Cluster-6081.15764;Cluster-3338.0;Cluster-6081.22007;Cluster-6081.15473;Cluster-6081.12295;Cluster-6081.19371;Cluster-6081.28585;Cluster-6081.12665;Cluster-6081.18549;Cluster-10870.0…	K09580|K13993|K04079|K13993|K13993|K03283|K10956|K13525|K14007|K13993|K03283|K13993|K08054|K03283|K03283|K09584|K13993|K13993|K14016|K12666|K03868|K08852|K09580|K03283|K03283|K13993|K09481|K01456|K13993|K13993|K10575|K13993|K09517|K12667|K01228|K09580|K03283|K03283|K13993|K13993|K03283|K11718|K03283|K09580|K03283|K03347|K04079|K13993|K03283|K13993|K12667|K04554|K08288|K05546|K09584|K03283|K13989|…
Citrate cycle (TCA cycle)	ko00020	11	69	0.99559	1	Cluster-6081.14384;Cluster-6081.15684;Cluster-6081.16301;Cluster-6081.12908;Cluster-6081.12941;Cluster-6081.14754;Cluster-6081.16417;Cluster-6081.14995;Cluster-6081.2514;Cluster-6081.12278;Cluster-6081.15203	K00026|K00025|K00031|K00627|K00382|K01648|K00025|K01648|K01647|K00627|K00026|
Basal transcription factors	ko03022	6	50	0.997933	1	Cluster-6081.29496;Cluster-6081.3014;Cluster-6081.18361;Cluster-6081.26249;Cluster-6081.9509;Cluster-6081.11553	K03128|K10843|K03144|K10844|K03138|K03124|
RNA degradation	ko03018	26	136	0.998003	1	Cluster-6081.11548;Cluster-6081.21304;Cluster-6081.18010;Cluster-6081.22223;Cluster-6081.25319;Cluster-6081.3161;Cluster-6081.22298;Cluster-6081.12187;Cluster-6081.16470;Cluster-6081.21019;Cluster-6081.21621;Cluster-6081.25264;Cluster-6081.7926;Cluster-8976.0;Cluster-6081.21521;Cluster-6081.7821;Cluster-6081.18986;Cluster-6081.6442;Cluster-6081.2331;Cluster-6081.9053;Cluster-6081.28450;Cluster-60…	K12603|K04077|K12619|K12616|K07573|K12606|K12587|K10643|K13126|K12598|K12600|K01689|K01148|K12581|K04077|K03654|K01689|K12580|K00850|K12603|K12604|K14442|K00962|K12604|K13126|K00850|
RNA polymerase	ko03020	6	51	0.998314	1	Cluster-6081.2611;Cluster-6081.22070;Cluster-6081.12030;Cluster-6081.15209;Cluster-6081.2603;Cluster-6081.18141	K03021|K03027|K03013|K03006|K03046|K03012|
Protein export	ko03060	7	61	0.999384	1	Cluster-6081.1052;Cluster-6081.22730;Cluster-6081.19049;Cluster-6081.8472;Cluster-6081.7559;Cluster-2197.0;Cluster-6081.8044	K03217|K10956|K09481|K03100|K03116|K09481|K03070|
Oxidative phosphorylation	ko00190	25	142	0.999491	1	Cluster-6081.17418;Cluster-6081.17667;Cluster-6081.25432;Cluster-6081.29144;Cluster-6081.21735;Cluster-6081.24846;Cluster-6081.18447;Cluster-6081.27766;Cluster-6081.7680;Cluster-4284.0;Cluster-6081.19757;Cluster-6081.4399;Cluster-6081.21283;Cluster-6081.23132;Cluster-6081.29931;Cluster-6081.13045;Cluster-6081.26952;Cluster-1438.0;Cluster-6081.29532;Cluster-6081.3664;Cluster-6081.1042;Cluster-6081…	K01535|K01535|K00412|K02132|K02261|K05577|K02132|K02150|K02260|K03946|K03883|K02153|K02256|K03878|K02132|K01507|K02262|K03955|K03936|K03879|K02109|K02115|K01507|K02126|K03881|
Aminoacyl-tRNA biosynthesis	ko00970	7	63	0.999591	1	Cluster-6081.27474;Cluster-6081.9197;Cluster-6081.13570;Cluster-11040.0;Cluster-6081.22650;Cluster-6081.4495;Cluster-6081.5378	K01883|K01866|K01870|K01869|K01874|K01893|K01881|
Ribosome biogenesis in eukaryotes	ko03008	15	103	0.999714	1	Cluster-6081.5592;Cluster-6081.4268;Cluster-293.0;Cluster-6081.4637;Cluster-6081.442;Cluster-6081.15536;Cluster-6081.12807;Cluster-6081.13558;Cluster-6081.1964;Cluster-6081.19915;Cluster-6081.18010;Cluster-6081.29374;Cluster-6081.25536;Cluster-6081.26885;Cluster-6081.6281	K14545|K03264|K14572|K18532|K14554|K03264|K14546|K14570|K14555|K07562|K12619|K14521|K14571|K14550|K13288|
mRNA surveillance pathway	ko03015	25	163	0.999979	1	Cluster-6081.20462;Cluster-6081.25049;Cluster-6081.20605;Cluster-12151.0;Cluster-7889.0;Cluster-6081.29250;Cluster-6081.28892;Cluster-6081.27535;Cluster-6081.4076;Cluster-6081.16730;Cluster-6081.16470;Cluster-6081.24730;Cluster-6081.24619;Cluster-6081.10599;Cluster-6081.24287;Cluster-6081.12726;Cluster-6081.15629;Cluster-6081.28884;Cluster-6081.21792;Cluster-6081.3023;Cluster-6081.29706;Cluster-6…	K06269|K11583|K14328|K06269|K08873|K14409|K14404|K06100|K14411|K12875|K13126|K11584|K03267|K14396|K13917|K11584|K14400|K14397|K12881|K03456|K03267|K06269|K13126|K14408|K06965|
RNA transport	ko03013	30	211	1	1	Cluster-6081.30246;Cluster-6081.20605;Cluster-6081.7100;Cluster-6081.15596;Cluster-6081.11992;Cluster-6081.18781;Cluster-6081.27086;Cluster-6081.19618;Cluster-6081.10467;Cluster-6081.16730;Cluster-6081.16470;Cluster-6081.24193;Cluster-6081.14267;Cluster-6081.4551;Cluster-11108.0;Cluster-6081.17776;Cluster-1391.0;Cluster-6081.24241;Cluster-6081.15500;Cluster-6081.28243;Cluster-6081.27805;Cluster-6…	K14298|K14328|K14311|K14310|K14292|K09291|K14288|K03113|K18213|K12875|K13126|K14289|K03262|K03113|K14292|K03259|K03231|K03253|K14319|K14319|K03243|K03260|K14319|K03252|K14300|K12881|K14309|K07562|K13126|K14289|
Proteasome	ko03050	3	79	1	1	Cluster-6081.3627;Cluster-6081.28922;Cluster-6081.17351	K02726|K03028|K02726|
Spliceosome	ko03040	37	274	1	1	Cluster-6081.97;Cluster-6081.14320;Cluster-6081.5370;Cluster-6081.28834;Cluster-6081.16365;Cluster-854.0;Cluster-6081.9987;Cluster-6081.29222;Cluster-3338.0;Cluster-6081.1107;Cluster-6081.22007;Cluster-6081.26217;Cluster-6081.9874;Cluster-6081.14149;Cluster-6081.8591;Cluster-6081.16730;Cluster-6081.28658;Cluster-10142.0;Cluster-6081.12464;Cluster-6081.7292;Cluster-6081.8263;Cluster-6081.13230;Clu…	K03283|K03283|K12818|K12818|K12823|K12874|K12818|K11094|K03283|K11099|K03283|K12867|K12818|K03283|K11087|K12875|K03283|K03283|K12827|K12818|K12813|K03283|K03283|K03283|K12854|K03283|K03283|K06063|K12881|K12818|K03283|K03283|K12813|K12818|K12831|K03283|K03283|
Ribosome	ko03010	18	345	1	1	Cluster-6081.18333;Cluster-3973.0;Cluster-6081.17022;Cluster-6081.25025;Cluster-6081.18694;Cluster-6081.8679;Cluster-6081.12012;Cluster-6081.4004;Cluster-6081.7860;Cluster-6081.23139;Cluster-6081.6012;Cluster-6081.2232;Cluster-6081.17219;Cluster-6081.18189;Cluster-6081.8452;Cluster-6081.1141;Cluster-4896.0;Cluster-6081.28377	K02906|K02889|K02945|K02871|K02883|K02988|K02866|K02918|K02902|K02984|K02945|K02957|K02914|K02913|K02906|K02866|K02965|K02995|

## Sheet: Table S6
Table S6. All HCN synthesis related genes in Vicia sativa seeds
Gene Name	Gene ID
CYP71A	Cluster-10458.0
CYP71A	Cluster-2959.0
CYP71A	Cluster-4950.0
CYP71A	Cluster-6081.1111
CYP71A	Cluster-6081.1371
CYP71A	Cluster-6081.1470
CYP71A	Cluster-6081.15777
CYP71A	Cluster-6081.17037
CYP71A	Cluster-6081.17576
CYP71A	Cluster-6081.18410
CYP71A	Cluster-6081.20095
CYP71A	Cluster-6081.21516
CYP71A	Cluster-6081.23687
CYP71A	Cluster-6081.25129
CYP71A	Cluster-6081.25613
CYP71A	Cluster-6081.26507
CYP71A	Cluster-6081.27014
CYP71A	Cluster-6081.28511
CYP71A	Cluster-6081.30914
CYP71A	Cluster-6081.3389
CYP71A	Cluster-6081.3764
CYP71A	Cluster-6081.4935
CYP71A	Cluster-6081.5026
CYP71A	Cluster-6081.5162
CYP71A	Cluster-6081.5321
CYP71A	Cluster-6081.6080
CYP71A	Cluster-6081.6455
CYP71A	Cluster-6081.7050
CYP71A	Cluster-6081.8148
CYP71A	Cluster-9431.0
CYP71B	Cluster-3149.0
CYP71B	Cluster-5314.0
CYP71B	Cluster-6081.11342
CYP71B	Cluster-6081.1422
CYP71B	Cluster-6081.15031
CYP71B	Cluster-6081.15778
CYP71B	Cluster-6081.1704
CYP71B	Cluster-6081.1759
CYP71B	Cluster-6081.18690
CYP71B	Cluster-6081.20335
CYP71B	Cluster-6081.21769
CYP71B	Cluster-6081.23012
CYP71B	Cluster-6081.24336
CYP71B	Cluster-6081.25133
CYP71B	Cluster-6081.25808
CYP71B	Cluster-6081.25972
CYP71B	Cluster-6081.26605
CYP71B	Cluster-6081.27066
CYP71B	Cluster-6081.28603
CYP71B	Cluster-6081.30365
CYP71B	Cluster-6081.3362
CYP71B	Cluster-6081.3533
CYP71B	Cluster-6081.4103
CYP71B	Cluster-6081.496
CYP71B	Cluster-6081.5086
CYP71B	Cluster-6081.5357
CYP71B	Cluster-6081.6615
CYP71B	Cluster-6081.7116
CYP71B	Cluster-6081.8996
CYP71B	Cluster-9431.1
CYP79A	Cluster-6081.10511
CYP79A	Cluster-6081.11557
CYP79A	Cluster-6081.14418
CYP79A	Cluster-6081.15097
CYP79A	Cluster-6081.15873
CYP79A	Cluster-6081.17575
CYP79A	Cluster-6081.1760
CYP79A	Cluster-6081.19005
CYP79A	Cluster-6081.21267
CYP79A	Cluster-6081.24376
CYP79A	Cluster-6081.25680
CYP79A	Cluster-6081.26409
CYP79A	Cluster-6081.26746
CYP79A	Cluster-6081.28109
CYP79A	Cluster-6081.28637
CYP79A	Cluster-6081.3576
CYP79A	Cluster-6081.4505
CYP79A	Cluster-6081.5187
CYP79A	Cluster-6081.5365
CYP79A	Cluster-6081.6916
CYP79A	Cluster-6081.9775
CYP79A	Cluster-9870.0
CYP79B	Cluster-10621.0
CYP79B	Cluster-3819.1
CYP79B	Cluster-6081.10600
CYP79B	Cluster-6081.1208
CYP79B	Cluster-6081.14584
CYP79B	Cluster-6081.1551
CYP79B	Cluster-6081.16370
CYP79B	Cluster-6081.17531
CYP79B	Cluster-6081.18072
CYP79B	Cluster-6081.19697
CYP79B	Cluster-6081.20478
CYP79B	Cluster-6081.23636
CYP79B	Cluster-6081.24355
CYP79B	Cluster-6081.25199
CYP79B	Cluster-6081.26064
CYP79B	Cluster-6081.26747
CYP79B	Cluster-6081.28335
CYP79B	Cluster-6081.28728
CYP79B	Cluster-6081.3603
CYP79B	Cluster-6081.4514
CYP79B	Cluster-6081.5396
CYP79B	Cluster-6707.0
CYP79F	Cluster-11876.0
CYP79F	Cluster-4383.0
CYP79F	Cluster-6081.10801
CYP79F	Cluster-6081.13179
CYP79F	Cluster-6081.14556
CYP79F	Cluster-6081.1572
CYP79F	Cluster-6081.16729
CYP79F	Cluster-6081.18319
CYP79F	Cluster-6081.19714
CYP79F	Cluster-6081.21482
CYP79F	Cluster-6081.24477
CYP79F	Cluster-6081.25516
CYP79F	Cluster-6081.26934
CYP79F	Cluster-6081.28370
CYP79F	Cluster-6081.28760
CYP79F	Cluster-6081.3659
CYP79F	Cluster-6081.4618
CYP79F	Cluster-6081.6046
CYP79F	Cluster-6081.6087
CYP79F	Cluster-9150.0
GH1	Cluster-11326.0
GH1	Cluster-2967.0
GH1	Cluster-6081.10137
GH1	Cluster-6081.10138
GH1	Cluster-6081.10379
GH1	Cluster-6081.11273
GH1	Cluster-6081.11390
GH1	Cluster-6081.11394
GH1	Cluster-6081.11396
GH1	Cluster-6081.11432
GH1	Cluster-6081.12490
GH1	Cluster-6081.12667
GH1	Cluster-6081.1380
GH1	Cluster-6081.15354
GH1	Cluster-6081.1774
GH1	Cluster-6081.18209
GH1	Cluster-6081.19520
GH1	Cluster-6081.20365
GH1	Cluster-6081.21200
GH1	Cluster-6081.22178
GH1	Cluster-6081.22180
GH1	Cluster-6081.22181
GH1	Cluster-6081.23448
GH1	Cluster-6081.24720
GH1	Cluster-6081.25846
GH1	Cluster-6081.283
GH1	Cluster-6081.3656
GH1	Cluster-6081.5467
GH1	Cluster-6081.6142
GH1	Cluster-6081.6205
GH1	Cluster-6081.8345
GH1	Cluster-6081.8743
GH17	Cluster-10526.0
GH17	Cluster-10627.0
GH17	Cluster-10691.0
GH17	Cluster-6081.10463
GH17	Cluster-6081.10551
GH17	Cluster-6081.11835
GH17	Cluster-6081.12037
GH17	Cluster-6081.12430
GH17	Cluster-6081.12544
GH17	Cluster-6081.13011
GH17	Cluster-6081.13365
GH17	Cluster-6081.13789
GH17	Cluster-6081.14075
GH17	Cluster-6081.14433
GH17	Cluster-6081.14475
GH17	Cluster-6081.14500
GH17	Cluster-6081.14788
GH17	Cluster-6081.14894
GH17	Cluster-6081.15287
GH17	Cluster-6081.15417
GH17	Cluster-6081.15775
GH17	Cluster-6081.16111
GH17	Cluster-6081.16310
GH17	Cluster-6081.16450
GH17	Cluster-6081.16539
GH17	Cluster-6081.17242
GH17	Cluster-6081.17492
GH17	Cluster-6081.17912
GH17	Cluster-6081.18383
GH17	Cluster-6081.19434
GH17	Cluster-6081.20642
GH17	Cluster-6081.21854
GH17	Cluster-6081.2441
GH17	Cluster-6081.25198
GH17	Cluster-6081.2550
GH17	Cluster-6081.26604
GH17	Cluster-6081.4053
GH17	Cluster-6081.4259
GH17	Cluster-6081.4640
GH17	Cluster-6081.4703
GH17	Cluster-6081.6388
GH17	Cluster-6081.6401
GH17	Cluster-6081.6579
GH17	Cluster-6081.7280
GH17	Cluster-6081.7547
GH17	Cluster-6081.8958
GH35	Cluster-6081.11906
GH35	Cluster-6081.13158
GH35	Cluster-6081.13197
GH35	Cluster-6081.16560
GH35	Cluster-6081.1703
GH35	Cluster-6081.17140
GH35	Cluster-6081.20277
GH35	Cluster-6081.20278
GH35	Cluster-6081.22460
GH35	Cluster-6081.22876
GH35	Cluster-6081.25836
GH35	Cluster-6081.27726
GH35	Cluster-6081.3256
GH35	Cluster-6081.4700
GH35	Cluster-6081.8534
GH35	Cluster-8501.0
GT1	Cluster-10257.0
GT1	Cluster-10347.0
GT1	Cluster-10678.0
GT1	Cluster-10949.0
GT1	Cluster-10989.0
GT1	Cluster-11366.0
GT1	Cluster-11501.0
GT1	Cluster-11583.0
GT1	Cluster-1572.0
GT1	Cluster-6081.10096
GT1	Cluster-6081.10119
GT1	Cluster-6081.10133
GT1	Cluster-6081.10134
GT1	Cluster-6081.10224
GT1	Cluster-6081.10241
GT1	Cluster-6081.10267
GT1	Cluster-6081.10348
GT1	Cluster-6081.10364
GT1	Cluster-6081.10409
GT1	Cluster-6081.10431
GT1	Cluster-6081.10526
GT1	Cluster-6081.10579
GT1	Cluster-6081.10631
GT1	Cluster-6081.10717
GT1	Cluster-6081.10824
GT1	Cluster-6081.10872
GT1	Cluster-6081.10935
GT1	Cluster-6081.10955
GT1	Cluster-6081.11012
GT1	Cluster-6081.11030
GT1	Cluster-6081.11049
GT1	Cluster-6081.11051
GT1	Cluster-6081.11069
GT1	Cluster-6081.11098
GT1	Cluster-6081.11137
GT1	Cluster-6081.11146
GT1	Cluster-6081.11157
GT1	Cluster-6081.11215
GT1	Cluster-6081.11239
GT1	Cluster-6081.11320
GT1	Cluster-6081.11345
GT1	Cluster-6081.1142
GT1	Cluster-6081.1143
GT1	Cluster-6081.11470
GT1	Cluster-6081.11511
GT1	Cluster-6081.11599
GT1	Cluster-6081.11625
GT1	Cluster-6081.11649
GT1	Cluster-6081.11702
GT1	Cluster-6081.11711
GT1	Cluster-6081.11749
GT1	Cluster-6081.11821
GT1	Cluster-6081.11842
GT1	Cluster-6081.11861
GT1	Cluster-6081.11922
GT1	Cluster-6081.11928
GT1	Cluster-6081.12032
GT1	Cluster-6081.12113
GT1	Cluster-6081.12138
GT1	Cluster-6081.12140
GT1	Cluster-6081.12147
GT1	Cluster-6081.12215
GT1	Cluster-6081.12263
GT1	Cluster-6081.12356
GT1	Cluster-6081.12571
GT1	Cluster-6081.1266
GT1	Cluster-6081.12722
GT1	Cluster-6081.12729
GT1	Cluster-6081.12782
GT1	Cluster-6081.12800
GT1	Cluster-6081.12837
GT1	Cluster-6081.12905
GT1	Cluster-6081.12917
GT1	Cluster-6081.12999
GT1	Cluster-6081.13000
GT1	Cluster-6081.13076
GT1	Cluster-6081.13084
GT1	Cluster-6081.13085
GT1	Cluster-6081.13095
GT1	Cluster-6081.13184
GT1	Cluster-6081.13328
GT1	Cluster-6081.13337
GT1	Cluster-6081.13354
GT1	Cluster-6081.13377
GT1	Cluster-6081.13452
GT1	Cluster-6081.13472
GT1	Cluster-6081.13535
GT1	Cluster-6081.13591
GT1	Cluster-6081.13609
GT1	Cluster-6081.13635
GT1	Cluster-6081.13718
GT1	Cluster-6081.13759
GT1	Cluster-6081.1391
GT1	Cluster-6081.13980
GT1	Cluster-6081.14095
GT1	Cluster-6081.14116
GT1	Cluster-6081.1413
GT1	Cluster-6081.14171
GT1	Cluster-6081.14197
GT1	Cluster-6081.14198
GT1	Cluster-6081.14207
GT1	Cluster-6081.14218
GT1	Cluster-6081.14272
GT1	Cluster-6081.14278
GT1	Cluster-6081.14361
GT1	Cluster-6081.14417
GT1	Cluster-6081.14517
GT1	Cluster-6081.14707
GT1	Cluster-6081.14794
GT1	Cluster-6081.14888
GT1	Cluster-6081.14936
GT1	Cluster-6081.14967
GT1	Cluster-6081.14996
GT1	Cluster-6081.15156
GT1	Cluster-6081.15386
GT1	Cluster-6081.15388
GT1	Cluster-6081.15645
GT1	Cluster-6081.15654
GT1	Cluster-6081.15716
GT1	Cluster-6081.15774
GT1	Cluster-6081.15783
GT1	Cluster-6081.15786
GT1	Cluster-6081.15788
GT1	Cluster-6081.15849
GT1	Cluster-6081.15864
GT1	Cluster-6081.15931
GT1	Cluster-6081.16063
GT1	Cluster-6081.16280
GT1	Cluster-6081.16313
GT1	Cluster-6081.16462
GT1	Cluster-6081.16531
GT1	Cluster-6081.16794
GT1	Cluster-6081.16861
GT1	Cluster-6081.17070
GT1	Cluster-6081.17135
GT1	Cluster-6081.17156
GT1	Cluster-6081.17181
GT1	Cluster-6081.17229
GT1	Cluster-6081.17255
GT1	Cluster-6081.17284
GT1	Cluster-6081.17285
GT1	Cluster-6081.17303
GT1	Cluster-6081.17350
GT1	Cluster-6081.17397
GT1	Cluster-6081.17399
GT1	Cluster-6081.1741
GT1	Cluster-6081.17432
GT1	Cluster-6081.17440
GT1	Cluster-6081.17456
GT1	Cluster-6081.17497
GT1	Cluster-6081.17514
GT1	Cluster-6081.17719
GT1	Cluster-6081.17757
GT1	Cluster-6081.17803
GT1	Cluster-6081.18012
GT1	Cluster-6081.18120
GT1	Cluster-6081.18163
GT1	Cluster-6081.18165
GT1	Cluster-6081.18312
GT1	Cluster-6081.18480
GT1	Cluster-6081.18596
GT1	Cluster-6081.1861
GT1	Cluster-6081.18619
GT1	Cluster-6081.18689
GT1	Cluster-6081.18710
GT1	Cluster-6081.18807
GT1	Cluster-6081.18816
GT1	Cluster-6081.18925
GT1	Cluster-6081.18931
GT1	Cluster-6081.18954
GT1	Cluster-6081.19077
GT1	Cluster-6081.19100
GT1	Cluster-6081.19202
GT1	Cluster-6081.19221
GT1	Cluster-6081.19246
GT1	Cluster-6081.19248
GT1	Cluster-6081.19305
GT1	Cluster-6081.19310
GT1	Cluster-6081.19338
GT1	Cluster-6081.19340
GT1	Cluster-6081.19363
GT1	Cluster-6081.19388
GT1	Cluster-6081.19430
GT1	Cluster-6081.19495
GT1	Cluster-6081.19600
GT1	Cluster-6081.19676
GT1	Cluster-6081.19693
GT1	Cluster-6081.19805
GT1	Cluster-6081.19809
GT1	Cluster-6081.19837
GT1	Cluster-6081.1984
GT1	Cluster-6081.19941
GT1	Cluster-6081.19957
GT1	Cluster-6081.20054
GT1	Cluster-6081.20078
GT1	Cluster-6081.20126
GT1	Cluster-6081.20141
GT1	Cluster-6081.20151
GT1	Cluster-6081.20189
GT1	Cluster-6081.20257
GT1	Cluster-6081.20306
GT1	Cluster-6081.20307
GT1	Cluster-6081.20309
GT1	Cluster-6081.20330
GT1	Cluster-6081.20413
GT1	Cluster-6081.20416
GT1	Cluster-6081.20421
GT1	Cluster-6081.20425
GT1	Cluster-6081.20426
GT1	Cluster-6081.20434
GT1	Cluster-6081.20459
GT1	Cluster-6081.20464
GT1	Cluster-6081.20651
GT1	Cluster-6081.20663
GT1	Cluster-6081.20820
GT1	Cluster-6081.21055
GT1	Cluster-6081.21164
GT1	Cluster-6081.21203
GT1	Cluster-6081.21221
GT1	Cluster-6081.21308
GT1	Cluster-6081.21357
GT1	Cluster-6081.21382
GT1	Cluster-6081.21413
GT1	Cluster-6081.21414
GT1	Cluster-6081.21470
GT1	Cluster-6081.21504
GT1	Cluster-6081.21531
GT1	Cluster-6081.21555
GT1	Cluster-6081.21587
GT1	Cluster-6081.21734
GT1	Cluster-6081.21740
GT1	Cluster-6081.21753
GT1	Cluster-6081.21771
GT1	Cluster-6081.21782
GT1	Cluster-6081.21796
GT1	Cluster-6081.21809
GT1	Cluster-6081.21811
GT1	Cluster-6081.21888
GT1	Cluster-6081.21921
GT1	Cluster-6081.21963
GT1	Cluster-6081.21966
GT1	Cluster-6081.22101
GT1	Cluster-6081.22222
GT1	Cluster-6081.22367
GT1	Cluster-6081.22376
GT1	Cluster-6081.22379
GT1	Cluster-6081.22392
GT1	Cluster-6081.22416
GT1	Cluster-6081.22420
GT1	Cluster-6081.22484
GT1	Cluster-6081.22508
GT1	Cluster-6081.22528
GT1	Cluster-6081.22587
GT1	Cluster-6081.22701
GT1	Cluster-6081.22769
GT1	Cluster-6081.22785
GT1	Cluster-6081.22931
GT1	Cluster-6081.22974
GT1	Cluster-6081.23071
GT1	Cluster-6081.23121
GT1	Cluster-6081.23130
GT1	Cluster-6081.23136
GT1	Cluster-6081.23168
GT1	Cluster-6081.23192
GT1	Cluster-6081.23201
GT1	Cluster-6081.23240
GT1	Cluster-6081.23275
GT1	Cluster-6081.23283
GT1	Cluster-6081.23295
GT1	Cluster-6081.23355
GT1	Cluster-6081.23378
GT1	Cluster-6081.23382
GT1	Cluster-6081.23383
GT1	Cluster-6081.23415
GT1	Cluster-6081.23496
GT1	Cluster-6081.23503
GT1	Cluster-6081.23536
GT1	Cluster-6081.23546
GT1	Cluster-6081.23599
GT1	Cluster-6081.23641
GT1	Cluster-6081.23705
GT1	Cluster-6081.23801
GT1	Cluster-6081.23893
GT1	Cluster-6081.23986
GT1	Cluster-6081.24001
GT1	Cluster-6081.24032
GT1	Cluster-6081.24072
GT1	Cluster-6081.24207
GT1	Cluster-6081.24217
GT1	Cluster-6081.24234
GT1	Cluster-6081.24260
GT1	Cluster-6081.24302
GT1	Cluster-6081.24369
GT1	Cluster-6081.24377
GT1	Cluster-6081.24485
GT1	Cluster-6081.24487
GT1	Cluster-6081.24488
GT1	Cluster-6081.24502
GT1	Cluster-6081.24524
GT1	Cluster-6081.24644
GT1	Cluster-6081.24675
GT1	Cluster-6081.24682
GT1	Cluster-6081.24694
GT1	Cluster-6081.24760
GT1	Cluster-6081.24794
GT1	Cluster-6081.24799
GT1	Cluster-6081.24801
GT1	Cluster-6081.24824
GT1	Cluster-6081.24881
GT1	Cluster-6081.25016
GT1	Cluster-6081.25186
GT1	Cluster-6081.25233
GT1	Cluster-6081.25309
GT1	Cluster-6081.25348
GT1	Cluster-6081.25426
GT1	Cluster-6081.25501
GT1	Cluster-6081.25527
GT1	Cluster-6081.25530
GT1	Cluster-6081.25601
GT1	Cluster-6081.25648
GT1	Cluster-6081.25663
GT1	Cluster-6081.25761
GT1	Cluster-6081.25767
GT1	Cluster-6081.25783
GT1	Cluster-6081.25922
GT1	Cluster-6081.25971
GT1	Cluster-6081.26016
GT1	Cluster-6081.26178
GT1	Cluster-6081.26190
GT1	Cluster-6081.26306
GT1	Cluster-6081.26313
GT1	Cluster-6081.26446
GT1	Cluster-6081.2645
GT1	Cluster-6081.26538
GT1	Cluster-6081.26565
GT1	Cluster-6081.2665
GT1	Cluster-6081.26663
GT1	Cluster-6081.26688
GT1	Cluster-6081.26691
GT1	Cluster-6081.26775
GT1	Cluster-6081.26822
GT1	Cluster-6081.26827
GT1	Cluster-6081.27115
GT1	Cluster-6081.2729
GT1	Cluster-6081.27423
GT1	Cluster-6081.27594
GT1	Cluster-6081.27895
GT1	Cluster-6081.28170
GT1	Cluster-6081.28233
GT1	Cluster-6081.28504
GT1	Cluster-6081.28870
GT1	Cluster-6081.28950
GT1	Cluster-6081.28996
GT1	Cluster-6081.29081
GT1	Cluster-6081.29130
GT1	Cluster-6081.2987
GT1	Cluster-6081.30047
GT1	Cluster-6081.3102
GT1	Cluster-6081.3135
GT1	Cluster-6081.3543
GT1	Cluster-6081.3571
GT1	Cluster-6081.3578
GT1	Cluster-6081.3601
GT1	Cluster-6081.3617
GT1	Cluster-6081.3756
GT1	Cluster-6081.3913
GT1	Cluster-6081.3933
GT1	Cluster-6081.3935
GT1	Cluster-6081.4199
GT1	Cluster-6081.4212
GT1	Cluster-6081.4303
GT1	Cluster-6081.4307
GT1	Cluster-6081.4406
GT1	Cluster-6081.4455
GT1	Cluster-6081.4484
GT1	Cluster-6081.4492
GT1	Cluster-6081.4517
GT1	Cluster-6081.4567
GT1	Cluster-6081.4680
GT1	Cluster-6081.4704
GT1	Cluster-6081.4771
GT1	Cluster-6081.4790
GT1	Cluster-6081.4824
GT1	Cluster-6081.4852
GT1	Cluster-6081.4928
GT1	Cluster-6081.5005
GT1	Cluster-6081.5035
GT1	Cluster-6081.5095
GT1	Cluster-6081.5110
GT1	Cluster-6081.5127
GT1	Cluster-6081.5144
GT1	Cluster-6081.5315
GT1	Cluster-6081.5387
GT1	Cluster-6081.5393
GT1	Cluster-6081.5400
GT1	Cluster-6081.5456
GT1	Cluster-6081.5561
GT1	Cluster-6081.5564
GT1	Cluster-6081.5596
GT1	Cluster-6081.5621
GT1	Cluster-6081.5710
GT1	Cluster-6081.5757
GT1	Cluster-6081.5810
GT1	Cluster-6081.5861
GT1	Cluster-6081.5895
GT1	Cluster-6081.5901
GT1	Cluster-6081.5911
GT1	Cluster-6081.5913
GT1	Cluster-6081.5966
GT1	Cluster-6081.5992
GT1	Cluster-6081.5995
GT1	Cluster-6081.6011
GT1	Cluster-6081.6048
GT1	Cluster-6081.6105
GT1	Cluster-6081.6132
GT1	Cluster-6081.6182
GT1	Cluster-6081.6186
GT1	Cluster-6081.6375
GT1	Cluster-6081.6376
GT1	Cluster-6081.6384
GT1	Cluster-6081.6396
GT1	Cluster-6081.6675
GT1	Cluster-6081.6812
GT1	Cluster-6081.6874
GT1	Cluster-6081.6917
GT1	Cluster-6081.6965
GT1	Cluster-6081.7005
GT1	Cluster-6081.7028
GT1	Cluster-6081.7083
GT1	Cluster-6081.7091
GT1	Cluster-6081.7159
GT1	Cluster-6081.7184
GT1	Cluster-6081.7255
GT1	Cluster-6081.7393
GT1	Cluster-6081.7463
GT1	Cluster-6081.7515
GT1	Cluster-6081.7541
GT1	Cluster-6081.7574
GT1	Cluster-6081.7577
GT1	Cluster-6081.7579
GT1	Cluster-6081.7594
GT1	Cluster-6081.7686
GT1	Cluster-6081.7690
GT1	Cluster-6081.7762
GT1	Cluster-6081.7806
GT1	Cluster-6081.7927
GT1	Cluster-6081.7993
GT1	Cluster-6081.8094
GT1	Cluster-6081.8144
GT1	Cluster-6081.8174
GT1	Cluster-6081.8215
GT1	Cluster-6081.8280
GT1	Cluster-6081.8284
GT1	Cluster-6081.8314
GT1	Cluster-6081.8319
GT1	Cluster-6081.8383
GT1	Cluster-6081.8403
GT1	Cluster-6081.8480
GT1	Cluster-6081.8676
GT1	Cluster-6081.8706
GT1	Cluster-6081.8763
GT1	Cluster-6081.8782
GT1	Cluster-6081.8788
GT1	Cluster-6081.8796
GT1	Cluster-6081.8843
GT1	Cluster-6081.8847
GT1	Cluster-6081.8914
GT1	Cluster-6081.8938
GT1	Cluster-6081.9038
GT1	Cluster-6081.9041
GT1	Cluster-6081.9135
GT1	Cluster-6081.9157
GT1	Cluster-6081.9225
GT1	Cluster-6081.9231
GT1	Cluster-6081.9234
GT1	Cluster-6081.9236
GT1	Cluster-6081.9265
GT1	Cluster-6081.9267
GT1	Cluster-6081.9279
GT1	Cluster-6081.9335
GT1	Cluster-6081.9337
GT1	Cluster-6081.9347
GT1	Cluster-6081.9438
GT1	Cluster-6081.9506
GT1	Cluster-6081.9545
GT1	Cluster-6081.9602
GT1	Cluster-6081.9715
GT1	Cluster-6081.9773
GT1	Cluster-6081.9821
GT1	Cluster-6081.9911
GT1	Cluster-6081.9980
GT1	Cluster-9046.0
GT13	Cluster-6081.20076
GT2	Cluster-4521.1
GT2	Cluster-6081.11642
GT2	Cluster-6081.12517
GT2	Cluster-6081.12718
GT2	Cluster-6081.15325
GT2	Cluster-6081.15964
GT2	Cluster-6081.3964
GT2	Cluster-6081.8638
GT2	Cluster-6081.8771
GT24	Cluster-6081.11868
GT24	Cluster-6081.12594
GT24	Cluster-6081.15521
GT24	Cluster-6081.15522
GT24	Cluster-6081.31085
GT34	Cluster-4810.0
GT34	Cluster-6081.10414
GT34	Cluster-6081.12388
GT34	Cluster-6081.16992
GT34	Cluster-6081.17699
GT34	Cluster-6081.25085
GT34	Cluster-6081.9695
GT8	Cluster-6081.10278
GT8	Cluster-6081.11888
GT8	Cluster-6081.6194
hdl	Cluster-10224.0
hdl	Cluster-6081.10714
hdl	Cluster-6081.20705
hdl	Cluster-6081.20707
hdl	Cluster-6081.21755
hdl	Cluster-6081.24929
hdl	Cluster-6081.3947
hdl	Cluster-6081.4840
hdl	Cluster-6081.5401
hdl	Cluster-6081.6651

## Sheet: Table S7
Table S7. Key regulatory genes in HCN formation
Gene ID	Gene	kIN	GS
Cluster-6081.14936	VsGT1-1	296.789	-0.822804
Cluster-6081.7690	VsGT1-2	290.609	-0.818678
Cluster-6081.21055	VsGT1-3	286.268	-0.715996
Cluster-6081.14967	VsGT1-4	286.098	-0.83339
Cluster-6081.17156	VsGT1-5	284.984	-0.851067
Cluster-6081.6965	VsGT1-6	284.855	-0.779976
Cluster-6081.13377	VsGT1-7	284.783	-0.79179
Cluster-6081.13635	VsGT1-8	284.651	-0.75429
Cluster-6081.22376	VsGT1-9	283.696	-0.816151
Cluster-6081.18480	VsGT1-10	283.391	-0.838789
Cluster-6081.8094	VsGT1-11	282.69	-0.838248
Cluster-6081.7515	VsGT1-12	282.612	-0.817181
Cluster-6081.8843	VsGT1-13	280.895	-0.810364
Cluster-6081.9267	VsGT1-14	280.601	-0.77624
Cluster-6081.5035	VsGT1-15	280.593	-0.787226
Cluster-6081.15325	VsGT2	289.15	-0.80851
Cluster-6081.11835	VsGH17	290.024	-0.81795
Cluster-6081.23687	VsCYP71A	281.47	-0.810527
